## 2 TITLE

Between semelparity and iteroparity: empirical evidence for a continuum of modes of

4 parity

6

## 8 AUTHOR

P. William Hughes

10 Max Planck Institute for Plant Breeding Research

Carl-von-Linné-Weg 10

12 50829 Köln

Email: [whughes@mpipz.mpg.de](mailto:whughes@mpipz.mpg.de)

14

## ABSTRACT

The number of times an organism reproduces (i.e. its mode of parity) is a fundamental life-history character, and evolutionary and ecological models that compare the relative fitness of strategies are common in life history theory and theoretical biology. Despite the success of mathematical models designed to compare intrinsic rates of increase between annual-semelparous and perennial-iteroparous reproductive schedules, there is widespread evidence that variation in reproductive allocation among semelparous and iteroparous organisms alike is continuous. This paper reviews the ecological and molecular evidence for the continuity and plasticity of modes of parity—that is, the idea that annual-semelparous and perennial-iteroparous life histories are better understood as endpoints along a continuum of possible strategies. I conclude that parity should be understood as a continuum of different modes of parity, which differ by the degree to which they disperse or concentrate reproductive effort in time. I further argue that there are three main implications of this conclusion: (1) That seasonality should not be conflated with parity; (2) that mathematical models purporting to explain the evolution of semelparous life histories from iteroparous ones (or vice versa) should not assume that organisms can only display either an annual-semelparous life history or a perennial-iteroparous one; and (3) that evolutionary ecologists should examine the physiological or molecular basis of traits underlying different modes of parity, in order to obtain a general understanding of how different life history strategies can evolve from one another.

## KEY WORDS

Parity; semelparity; iteroparity; life history; reproduction; phenology; annual; perennial

## 38 INTRODUCTION

Semelparity (and the related botanical term “monocarpy”) describes the life history defined by a single, highly fecund bout of reproduction, and can be contrasted with iteroparity (“polycarpy”), the life history defined by repeated (i.e. “iterative”) bouts of reproduction throughout life. Identifying the reasons why organisms adopt either mode of parity is one of life history theory’s oldest problems, having been considered by both Aristotle (*History of Animals*, BkIX, 622 1-30, trans. Thompson, 1907) and Linnaeus (Linnaeus, 1744). In contemporary evolutionary ecology, this problem has been formalized by age-structured demographic models that seek to explain the eco-evolutionary dynamics of reproductive patterns by comparing the intrinsic rates of increase of reproductive strategies (Cole, 1954; Bryant, 1971; Charnov and Schaffer, 1973; Young, 1981; Omielan, 1991; Su and Peterman, 2012; Javoš, 2013; Vaupel et al., 2013; Cushing, 2015). In such models, two modes of parity are considered, classified by whether they express all reproductive effort in a single year (semelparity), or in more than one (iteroparity). I refer to this simplified conception as the “discrete conception of parity”. The main advantage of the discrete conception of parity is its analytical simplicity; given population growth data, intrinsic rates of increase can be easily computed and directly compared. Some intraspecific comparisons between phenotypically similar semelparous and iteroparous congeners conform to the predictions of demographic models based on the discrete conception of parity (e.g. Fritz et al., 1982; Young, 1984, 1990; Iguchi and Tsukamoto, 2001).

However, in this review I will argue that despite the modest successes—both

theoretical and empirical—of evolutionary explanations rooted in the discrete conception of parity, sufficient evidence has been accumulated to make it clear that, like many other life-history traits, parity is a continuous variable, and that semelparity and iteroparity are the endpoints of a continuum of possible strategies that define the distribution of reproductive effort through time, rather than simple alternatives describing whether an organism fatally reproduces in a given year or not. On this account, semelparity can be understood as the strategy defined by concentrating reproductive effort in time, and iteroparity as the strategy defined by distributing reproductive effort over longer timescales. I refer to this idea hereafter as the “continuous conception of parity”. It is important to note that the continuous conception of parity should not be conflated with the related terms “annuality” and “perenniality”. These terms specify strategies defined by the “digitization” of reproduction in response to seasonal effects supervening on the process of reproduction, rather than describing how concentrated reproductive effort is in time. This distinction is further discussed later.

The idea that parity itself is continuous and not discrete is not new (see: Hughes and Simons, 2014c; Kirkendall and Stenseth, 1985; Unwin, Kinnison and Quinn, 1999; Roff, 1992), but to date no systematic exposition of the empirical evidence supporting the different conceptions of parity has yet been undertaken. Furthermore, evolutionary explanations of life-history differences between clades with differing modes of parity continue to rely on the discrete conception of parity (e.g. Lopes and Leiner, 2015), and mathematical models based on the formalization of this assumption continue to be produced (e.g. Benton and Grant, 1999, Davydova et al., 2005; Vaupel et al., 2013). However, because of the ubiquity of evolutionary transitions from iteroparity to

semelparity (Table 1), understanding parity as a continuous trait is important for

understanding the underlying eco-evolutionary dynamics that affect the fitness of life-history strategies.

In this review I begin by reviewing the development of both the discrete and continuous conceptions of parity as evolutionary hypotheses and/or models. Next, I

review empirical work that highlights the existence of natural variation in reproduction along a semelparity-iteroparity continuum, focusing on three distinct strategies:

facultative iteroparity, facultative semelparity, and phenotypically plastic parity. I conclude by exploring the implications of the continuous conception of parity for: (1) the

study of seasonality as a “digitization” of reproduction, (2) the process of mathematically modelling life-history optimization, and (3) the study of the molecular regulation of

reproductive traits linked to parity.

## **(1) Reviewing Discrete and Continuous Conceptions of Parity**

### **1.1 - ‘Cole’s Paradox’ and the development of the discrete model of parity**

Although the first mathematical model of the intrinsic rate of increase of annual plants was constructed by Linnaeus (1744), Lamont Cole (1954) was the first to

categorize life histories into dichotomous “semelparous” and “iteroparous” groups: a semelparous organism is one that “dies upon producing seed” and therefore “potential

population growth may be considered on the assumption that generations do not overlap” (p. 109), while iteroparous organisms include a variety of cases, from those where “only

two or three litters of young are produced in a lifetime” as well as “various trees and tapeworms, where a single individual may produce thousands of litters” (p. 118). Thus, Cole created, and contemporary theorists have inherited, a conception of parity as a discrete variable: an organism either reproduces more than once or it doesn’t.

Cole also identified “the paradox of semelparity”, and wrote that “for an annual species, the absolute gain in intrinsic population growth which could be achieved by changing to the perennial reproductive habit would be exactly equivalent to adding one individual to the average litter size” (Cole 1954, p. 118). Consequently, according to the model he developed, a semelparous or iteroparous strategy evolves in response to strong directional selection for trait-values that: (1) maximize the annual rate of intrinsic increase; and (2) are subject to tradeoffs, since reproductive effort is always limited by resource availability. The “paradox of semelparity” is that the relative intrinsic rates of increase for semelparous and iteroparous strategies are very similar (i.e. they differ only by one individual—the mother), which suggests that iteroparity, not semelparity, should be rare, while in nature, iteroparous life histories are generally more common than semelparous ones. Cole’s articulation of the paradox of semelparity motivated many studies searching for theoretical selective advantages of traits linked to discrete semelparous and iteroparous strategies (Murdoch, 1966; Murphy, 1968; Omielan, 1991; Su and Peterman, 2012; Vaupel et al., 2013; Cushing, 2015), as well as attempts to detect these selective advantages in natural systems (Murphy and Rodhouse, 1999; Kaitala et al., 2002; Kraaijeveld et al., 2003; Franklin and Hogarth, 2008; Gagnon and Platt, 2008; Fisher and Blomberg, 2011). Following Cole, semelparous strategies considered in later life history models were usually also annual (although empirical data on long-lived

semelparous organisms was also collected, e.g. Young and Augspurger, 1991; García,  
 128 2003), and thus the primary goal of many models purporting to explain the evolution of  
 semelparity was to provide reasons why a perennial-iteroparous strategy might confer  
 130 higher fitness than an annual-semelparous one.

Cole's "paradox of semelparity" was resolved by acknowledging that differences  
 132 in age-specific rates of mortality affect the relative fitness of semelparous and iteroparous  
 habits. Building on prior analytical work (see: Murphy, 1968; Emlen, 1970; Gadgil and  
 134 Bossert, 1970; Bryant, 1971), Charnov and Schaffer (1973) and Schaffer (1974b) noted  
 that the expected fitness value of individuals at juvenile (i.e. prereproductive) and adult  
 136 (i.e. reproductively mature) developmental stages often differed. They then argued that  
 when the survival of adults was more assured than the survival of juveniles, an  
 138 iteroparous habit would have a growth advantage over a semelparous one. Thus, their  
 model emphasized that the value of the age class with a lower age- or stage-specific rate  
 140 of mortality was—assuming equal fitness across age classes—greater than the value of  
 the age class with a higher rate of mortality. Young (1981) extended this insight into a  
 142 more general model of intrinsic rates of increase, which incorporated not only differences  
 in age-specific survivorship, but also differences in prereproductive development time  
 144 and time between reproductive episodes. This model provided three major reasons why  
 semelparity might be favoured by natural selection. First, high adult mortality—or the  
 146 early onset of reproductive senescence—might prevent iteroparous species from accruing  
 fitness gains from established parents over long timescales. Second, a high population  
 148 growth rate should favour semelparity outright. Third, when the marginal cost of  
 additional offspring is inversely proportional to the number of offspring produced,

fecundity is maximized by investing all reproductive effort into a single episode, i.e. adopting an extreme annual-semelparous life history—see also Schaffer (1974) and Schaffer and Gadgil (1975).

## 1.2 – Recent work extending the theory that parity is a discrete trait

Given that earlier work sought to explain the prevalence of semelparous and iteroparous strategies by identifying differences in age-specific mortality, recent work has sought to explain why differences in age-specific mortality persist, as well as how varying environmental conditions facilitate the co-existence of different modes of parity. Bulmer (1985, 1994) incorporated a model that incorporated density-dependence, a model that was generalized by Ranta et al. (2002). Another common approach has been to use simulations, based on comparisons between discrete strategies, to argue that spatial heterogeneity and stochastic events (i.e. demographic disasters and windfalls) influence the evolutionary stability of each mode of parity over small spatial scales (e.g. Ranta et al., 2001). Similarly, Zeineddine and Jansen (2009) examined the role that discrete modes of parity may play in evolutionary tracking, suggesting that species adopting an annual-semelparous strategy may have an evolvability advantage over perennial-iteroparous congeners. Moreover, considerable evidence now supports two general conclusions: (1) that theoretically optimal life history strategies strongly depend on optimizing parity (Maltby and Calow, 1986; Keeley and Bond, 1999; Iguchi and Tsukamoto, 2001; Stegmann and Linsenmair, 2002; Kraaijeveld et al., 2003; Leiner et al., 2008; Trumbo, 2013), but also (2) that parity is especially important for predicting reproductive



scheduling (Schaffer and Gadgil, 1975; Kozłowski and Wiegert, 1986; Iwasa, 1991; Kozłowski, 1992; McNamara, 1997; Cooke et al., 2004; Miller et al., 2012; Vaupel et al., 2013; Oizumi, 2014), and/or the optimal allocation of reproductive effort to offspring (Cohen, 1966; Smith and Fretwell, 1974; Winkler and M., 2002; Einum and Fleming, 2007; Gremer and Venable, 2014; Mironchenko and Kozłowski, 2014). Thus the current theoretical life history literature is replete with papers discussing the knock-on effects of the assumption that modes of parity are discrete rather than continuous.

### 1.3 Empirical support for the discrete conception of parity

Empirical support for the discrete model of parity is strongest where perennial-iteroparous and annual-semelparous (or, rarely, perennial-semelparous) congeneric species have starkly different life histories. For instance, in a comparison of Mount Kenya species of the genus *Lobelia*, Young (1984) found that juvenile and adult mortality of the annual-semelparous species *L. telekii* were higher than in the closely related perennial-iteroparous species *Lobelia keniensis*. Young concluded that the difference in age-specific rates of mortality would strongly influence the expected value of future reproduction for each species, leading to perennial-iteroparity in one species and annual-semelparity in the other (Young, 1990). Similar comparisons between semelparous and iteroparous congeners or confamilials have been conducted in insects (Fritz et al., 1982; Stegmann and Linsenmair, 2002), salmon (Dickhoff, 1989; Unwin et al., 1999; Crespi and Teo, 2002; Kindsvater et al., 2016), snakes (Bonnet, 2011), algae (De Wreede and Klinger, 1988) and dasyurid marsupials (Kraaijeveld et al., 2003; Mills et al., 2012).

Other studies have focused on reproductive effort, since a declining marginal cost of offspring in terms of reproductive effort should select for an annual- or perennial-semelparous life history over an perennial-iteroparous one. This is the cited cause of the evolution of semelparity in *Digitalis purpurea* (Sletvold, 2002), and in *Antechinus agilis* (Smith and Charnov, 2001; Fisher and Blomberg, 2011). Growth rate is also important; in two subspecies of *Yucca whipplei*, the semelparous variant showed higher viability and faster time to germination than the iteroparous variant did (Huxman and Loik, 1997). Further studies highlight the mortality differences between juveniles and adults, which explains the evolution of semelparity in a variety of long-lived semelparous plants (Foster, 1977; Kitajima and Augspurger, 1989; Young and Augspurger, 1991), as well as in salmonids (Fleming, 1998; Crespi and Teo, 2002; Hendry et al., 2004; Sloat et al., 2014).

Models have been developed that use demographic parameters to predict age and size at first flowering for semelparous (monocarpic) plants; however, these models have been found to be more appropriate for long-lived than short-lived species (Metcalf et al 2003, Rees and Rose 2002). More recently, mathematical modelling of evolutionary responses to discrete semelparous and iteroparous strategies has focused on whether the maintenance of both modes of parity can be a consequence of stochasticity in the ratio of juvenile to adult mortality (Murphy, 1968; Ranta et al., 2002), of differences in the effects of density on age-specific mortality (Bulmer, 1985), or as a consequence of population instability (Ranta et al., 2000).

## 216    **1.4 – The continuous conception of parity**

218                    However, in many cases substantial unexplained variation in parity exists even  
 220                    after factors such as age-specific mortality, density dependence, and environmental  
 222                    effects are taken into account. For this reason it seems as though models based on the  
 224                    discrete conception of parity describe a limited range of special cases and not the  
 226                    majority of systems with congeneric or confamilial species with different reproductive  
 228                    strategies. This problem arises because theoretical models of the discrete conception of  
 230                    parity make two characteristic assumptions. First, these models assume that reproductive  
 232                    output is allocated among cycles (typically seasons or years) rather than expressed  
                          continuously. This means that offspring produced at two different times within a single  
                          season are “counted” as being part of the same reproductive episode, while offspring  
                          produced at two different times in two different seasons are counted as part of  
                          categorically different reproductive episodes. This permits the calculation of threshold  
                          values (e.g. of size or age) beyond which selection should begin to favour one mode of  
                          parity or the other, but is based on a distinction that is arbitrary. Second, each individual  
                          is assumed to express a single reproductive strategy; models do not predict  
                          phenotypically plastic modes of parity, or facultative switching between modes.

234                    These assumptions do not hold in many cases. The fact that semelparous  
 236                    reproduction rarely occurs “once”—i.e. in exactly one place, at exactly one time—has led  
                          to a new treatment of parity as continuously varying between extremes of “pure”  
                          semelparous and iteroparous reproduction. This approach has gained traction because  
                          there is considerable ambiguity in “breeding once” (Kirkendall and Stenseth, 1985).

Moreover, “annuality” and “perenniality”—terms that refer to the number of years in which organisms reproduce—cannot be used interchangeably with “semelparity” and “iteroparity”, which refer to the number of reproductive episodes organisms have (Fritz et al., 1982; Kirkendall and Stenseth, 1985). In “The Evolution of Life Histories”, Roff (1992) noted that, “if we consider our unit of time to be a single year, annuals can be termed semelparous and perennials iteroparous. A further division is possible within annuals, for some reproduce once and are, therefore, semelparous within any time scale, while others flower repeatedly throughout the summer and, hence, are iteroparous with respect to annuals that flower only once, but semelparous with respect to perennials” (p. 248). That is, it is the simultaneity and the finality of the reproductive episode (i.e. the concentration of reproductive effort) that defines perfect semelparity. Therefore, the continuous conception characterizes “extreme” semelparity to be a single, complete, and exhaustive reproductive episode where all reproductive effort is invested at once. Examples of this strategy—which Kirkendall and Stenseth (1985) termed “uniparity”—include mayflies and mites of the genus *Adactylidium* (Edmunds et al., 1976; Corkum et al., 1997). Both male and female mayflies die shortly after mating and dispersing fertilized eggs. In *Adactylid* mites, offspring devour the mother from the inside out, and are thus obligately annual-semelparous (Elbadry and Tawfik, 1966; Goldrazena et al., 1997). The correspondingly “extreme” perennial-iteroparous strategy is a long-lived perennial strategy that spreads reproductive effort out evenly among a very large number of reproductive cycles. Many species, including bristlecone pine, many deep-sea zoanthids, and other supercentennial species that reproduce regularly show such a habit (Baker, 1992; Druffel et al., 1995; Finch, 1998; Rozas, 2003). Intermediate strategies

complete reproduction over a shorter timescale than bristlecone pine, but over a longer

262 timescale than Adactylid mites.

The continuous conception of parity is therefore very simple: parity is a trait like  
 264 any other, and continuous variation in factors affecting reproduction (e.g. resource  
 availability, timing of reproduction, etc.), where subject to evolution by natural selection,  
 266 should result in continuous variation in reproductive strategy (see: Salguero-Gómez et al.,  
 2016). Furthermore, rather than considering only whether organisms complete  
 268 reproduction within a given year, and making no finer distinction, life history strategies  
 should be compared by the degree to which they concentrate or disperse reproductive  
 270 effort—and hence risk of reproductive failure—in time. For example, a mature biennial  
 strategy (where an organism reproduces once per year in two consecutive years)  
 272 distributes reproductive effort over a shorter timescale than does a long-lived perennial  
 congener (where an organism reproduces once per year in many years); although the  
 274 biennial strategy is not semelparous, it is further toward the “uniparous” end of the  
 continuum of modes of parity than is the perennial strategy. Similarly, an annual-  
 276 semelparous life history that reproduces rapidly lies further toward this end of the  
 continuum than does an annual-semelparous life history in which reproduction is spread  
 278 over a longer period of time.

## 280 **1.5 Empirical support for the continuous conception of parity**

There is considerable empirical support, from lab and field studies alike, for the

282 notion that parity varies continuously. These results have made it increasingly clear that  
demographic explanations rooted in the discrete model of parity fail to provide an  
284 universal evolutionary explanation for the appearance of different modes of parity. The  
most obvious objections to the universal applicability of this theory come from species  
286 that are facultatively semelparous, from species that reproduce irregularly or  
opportunistically, or from comparisons between related iteroparous and semelparous  
288 species that do not show measurable differences in factors affecting intrinsic rates of  
increase, including age-specific rates of mortality. These situations are not uncommon in  
290 nature. The problem they present is significant because the evolutionary transition from  
semelparity to iteroparity (and back) is ubiquitous, and has occurred in a wide variety of  
292 taxa (see Table 1 for an example using data from angiosperm orders).

There are important consequences for adopting the continuous conception of  
294 parity as a starting point for modelling the evolution of different modes of parity.  
Mathematical models based on the discrete conception of parity often predict threshold  
296 values—in mortality rate, size at initiation of reproduction, or expected growth rate—that  
do not agree with empirical observation (Omielan, 1991; Lessells, 2005; Piñol and  
298 Banzon, 2011; Su and Peterman, 2012; Trumbo, 2013; Vaupel et al., 2013). In particular,  
ESS models derived from assumptions rooted in the discrete conception of parity  
300 frequently underestimate the adaptive value of semelparous reproductive strategies; even  
after accounting for the effects of environmental stochasticity and density-dependence,  
302 ESS models predict that semelparous strategies should be less abundant—and less fit—  
than they have been found to be (Benton and Grant, 1999). In addition, there are  
304 empirical cases that explicitly do not conform to the predictions of the discrete model.

For example, an analysis of 12 winter-establishing primrose species (*Oenothera*:

Onagraceae) found no significant differences in mortality estimates or in environmental determinants of fitness for semelparous and iteroparous species (Evans et al., 2005). In some cases, the problem may be that life histories are too complex for organisms to follow discrete strategies; many salmon species also do not fit neatly into “classical” annual- or perennial-semelparous and perennial-iteroparous classifications (Unwin et al., 1999; Hendry et al., 2004). Other research has suggested that deterministic models of investment may better fit long-lived than short-lived semelparous species, given that many annual semelparous species (usually plants) show substantial phenotypic plasticity in phenology (e.g. size at first flowering), offspring quality and overall fecundity (Burd et al., 2006).

In order to provide a coherent exposition of the extensive body of recent work that shows empirical support for the continuous conception of parity, in what follows I focus on three “intermediate” life histories that are neither annual-semelparous nor perennial-iteroparous, but express another mode of parity that falls somewhere in between. These include: (1) facultative iteroparity; (2) facultative semelparity; and (3) phenotypically plastic parity. Although these three examples are the most common modes of parity that are neither classically (annual- or perennial-) semelparous nor iteroparous, other intermediate strategies exist, particularly when species or clades have idiosyncratic life histories. In addition, an individual population or species may itself express multiple modes of parity. For instance, arctic cod (*Boreogadus saida*) are annual-semelparous in nature, but can reproduce in two consecutive years in captivity, making them facultatively iteroparous (Hop et al., 1995; Hop and Gjosaeter, 2013). However, males

and females of this species also seem to have different life histories – males begin to reproduce at an earlier age, and can allocate extreme amounts of reproductive effort to a single instance of reproductive activity; semelparity in this species is thus also phenotypically plastic (Nahrgang et al., 2014). Although examples of each life history are provided below, many more have been added to Table 2, a list of species showing facultatively varying or plastic modes of parity.

## 1.6 Empirical evidence of facultative variation in parity

### 1.6.1 Facultative Iteroparity

Many semelparous species have shown the ability to facultatively reproduce one or more times after an initial bout of reproduction has begun and ended—this is termed “facultative iteroparity”. Facultative iteroparity can be adaptive when it either: (1) provides an opportunity to realize fitness gains from an unexpected abundance of resources, or (2) shifts reproductive effort from inopportune to opportune times. The first type of adaptive facultative iteroparity occurs when additional bouts of reproduction increase fitness by permitting unexpected “bonus” resources to be invested in new offspring. For example, mothers of the semelparous crab spider *Misumena vatia* (Araneae, Thomsidae) typically lay and provision a single brood of eggs (Gertsch, 1939; Morse, 1979), however in response to high food availability and/or usually warm environmental conditions, they are capable of laying and caring for a second brood if sperm supplies are not depleted (Morse, 1994). A similar facultative double-broodedness in response to



unusually favourable environment has been observed in the green lynx spider *Peucetia*  
 350 *viridans* (Fink, 1986). In addition, a small proportion of Chinook salmon  
*(Onchorhynchus tshawytscha)*, which typically reproduce only once, have been found to  
 352 survive and reproduce in two or three additional seasons (Unwin et al., 1999). Tallamy  
 and Brown (1999) showed that large, well-provisioned female burying beetles in multiple  
 354 species in the genus *Nicrophorus* can reproduce more than once, despite the fact that  
 small females can typically breed only once.

356 The second form of adaptive facultative iteroparity occurs when deferral of  
 reproductive effort—from a primary reproductive episode to a secondary one—allows an  
 358 organism to reproduce at a more opportune time. Reproduction is deferred to seek the  
 highest marginal fitness return on invested reproductive effort. For example, when high  
 360 organic pollution levels disrupt primary reproduction in the freshwater leech *Erpobdella*  
*octoculata*, reproduction ceases and remaining reproductive effort is deferred to a second  
 362 reproductive bout produced the next year (Maltby and Calow, 1986). Similar behaviour  
 has been seen in another Erpobdellid leech, *Erpobdella obscura* (Peterson, 1983; Davies  
 364 and Dratnal, 1996) as well as in many cephalopods (Rocha et al., 2001). Adaptive  
 deferral of reproductive effort is common in crab spiders. In *Lysiteles coronatus*, artificial  
 366 brood reductions resulted in the production of a second brood, and the degree of deferral  
 was proportional to the degree of the original reduction (Futami and Akimoto, 2005).  
 368 This was also observed in the field in Eresid spiders of the genera *Anelosimus* and  
*Stegodyphus*, both of which facultatively produce a second brood in response to nest  
 370 predation (Schneider and Lubin, 1997; Schneider et al., 2003; Grinsted et al., 2014).  
 Although the adaptive potential of facultative iteroparity is often apparent, facultative

iteroparity may also be vestigial instead of adaptive. In this case, the organism's life history merely reflects an ancestral state, and the second (or additional) bout of reproduction should confer little or no adaptive value (Golding and Yuwono, 1994; Hughes and Simons, 2014b).

### 1.6.2 Facultative Semelparity

Facultative semelparity occurs when species that are normally perennial-iteroparous—i.e. have multiple, discontinuous reproductive episodes that span more than one year—are capable of expressing only a single reproductive bout (Christiansen et al., 2008). This is a useful strategy for organisms to use to take advantage of unusually good environmental conditions for reproduction. For example, in the short-lived mustard *Boechera fecunda* (also known as *Arabis fecunda*; Brassicaceae), plants are capable of wide range of reproductive strategies, from near-instantaneous semelparity to multi-year iteroparity. This is because *B. fecunda* can produce many small axillary inflorescences in any given year, and their production does not preclude flowering by the same rosette in the subsequent year. However, plants can also produce large “terminal inflorescences” that exhaust remaining resources and lead to senescence and death. Although some plants produce axillary inflorescences for several years before a terminal inflorescence, others produce a terminal inflorescence in their first year (Lesica and Shelly, 1995; Lesica and Young, 2005). A similar system is seen in common foxglove, *Digitalis purpurea* (Scrophulariaceae), which is predominantly biennial or perennial-iteroparous, but can be facultatively semelparous if resource availability in the first year is high (Sletvold, 2002).

394 Facultative semelparity has also been observed in capelin (Christiansen et al., 2008; Loïc  
et al., 2012), squid, soil microarthropods (Siepel, 1994), dasyurid marsupials (Kraaijeveld  
396 et al., 2003; Martins et al., 2006), and in the flowering plants *Ipomopsis aggregata*  
(Silvertown and Gordon, 1989) and *Cynoglossum officinale* (Williams, 2009). Some  
398 facultatively semelparous species show a continuous range of types of reproductive  
episode, rather than discretely fatal or non-fatal ones. *Erysimum capitatum* (Brassicaceae)  
400 produces multiple reproductive episodes in environments where water is plentiful;  
however, where water is scarce it expresses a semelparous strategy (Kim and Donohue,  
402 2011).

### 1.6.3 Phenotypically Plastic Parity

404 Like other traits, mode of parity can be phenotypically plastic. This occurs when  
different modes of parity are expressed by a single species in response to environmental  
406 cues. Different modes of parity can occur both: (1) among individuals; or (2) within the  
reproductive episode of a single individual. Phenotypically plastic mode of parity is  
408 common source of intraspecific variation in life history characters; thus this is a major  
source of confusion for mathematical models that predict a single optimal value for all  
410 semelparous and all iteroparous habits. Such differences need not be dramatic—for  
example, as a consistent response to environmental triggers, even small differences in the  
412 length of a semelparous reproductive episode may have significant effects on fitness.

Strong empirical evidence of phenotypically plastic mode of parity is found in sea  
414 beets (Beta spp., Amaranthaceae), which display reproductive strategies along “a gradient  
from pronounced iteroparity to pronounced semelparity” (Hautekète et al., 2001, p.

796). Interestingly, the selective pressures faced by these species seem to elicit similar plastic responses. Environmental stressors cause individuals to trade off future fecundity for increased immediate reproductive effort, resulting in a parity gradient tending to semelparity when environmental stress becomes intense (Hautekèete et al., 2001, 2009). This pattern is consistent with the prediction that higher current reproductive effort can prevent organisms from being exposed to uncertain or risky environments (Williams, 1966; Vahl, 1981; Rubenstein, 2011; Trumbo, 2013). Similar trade-offs were observed in *Yucca whipplei* (Huxman and Loik, 1997), *Chusquea ramosissima* (Montti et al., 2011), and *Onopordum illyricum* (Rees et al., 1999). *Lobelia inflata* is capable of producing different semelparous strategies, from a nearly instantaneous annual-semelparity, where plants produce many similar flowers quickly and simultaneously, to (nonadaptive) facultative biennial-iteroparity, where as much as half of all reproductive effort is invested in a second reproductive episode. The time of initiation of reproduction strongly predicted which of these strategies is realized (Hughes and Simons, 2014b; c).

Many insect species are also capable of displaying a range of modes of parity among individuals (Trumbo, 2013). In the assassin bug (*Atopozelus pallens*), females deposit eggs in small clutches, approximately every two days. However, the number of clutches—and hence how prolonged this reproductive episode is—varies substantially (Tallamy et al., 2004). Similarly, European earwigs (*Forficula auricularia*) show condition-dependent semelparity; females either deposit all eggs into a single clutch or lay two clutches (Meunier et al., 2012; Ratz et al., 2016). Most insects showing variation in the number of clutches produced do so in response to abiotic cues, particularly temperature and day length (Bradshaw, 1986). This behavior can also be found in

ascidarians (Grosberg, 1988) and semelparous mammals (Wolfe et al., 2004; Mills et al.,  
440 2012).

Phenotypic plasticity within a reproductive episode of a single individual is  
442 noticeable when a semelparous organism displays a changing reproductive strategy—  
varying along the continuum of parity—that cannot be attributed to developmental,  
444 environmental, or architectural constraints (Diggle, 1995, 1997). This pattern is more  
difficult to detect than phenotypically plastic strategies that differ between individuals,  
446 but in many systems observable differences exist between the “packaging” of  
reproductive effort, resulting in adaptive variation in phenology or offspring quality  
448 through time. This can be difficult, since because they reproduce only once, semelparous  
organisms are expected to show high reproductive effort (Bonser and Aarssen, 2006).  
450 However, the development of fruits of the semelparous plant *Lobelia inflata* varied  
continuously; in this system, late fruits showed accelerated phenology and higher  
452 offspring quality relative to early fruits. This pattern, which indicated that more  
reproductive effort was invested in later fruit, shows that *L. inflata* does not “reproduce  
454 once” but dynamically allocates reproductive effort throughout a sequence of repeated  
fruiting events ((Hughes and Simons, 2014a, 2015). Likewise, in populations of the  
456 semelparous plant *Centaurea corymbosa*, plants showed highly variable life cycles—  
dynamically varying the proportion of reproductive effort allocated to sequential  
458 flowers—depending on environmental conditions and crowding (Acker et al., 2014).

### 1.7 Evolutionary transitions between modes of parity are ubiquitous

460 Transitions between different strategies along the semelparity-iteroparity

continuum are common throughout the tree of life. Furthermore, modes of parity appear  
to be evolutionarily labile within species, and many species show significant intraspecific  
differences in the expression of parity (e.g. Maltby and Calow, 1986; Hughes and  
Simons, 2014a; c). Thus while some clades consistently display a single mode of parity  
(e.g. most placental mammals are exclusively iteroparous), many clades show  
considerable variability (see Table 1 for data from plant orders). Among cephalopoda  
(Mollusca), *Loligo opalescens*, *Octopus vulgaris*, *O. mimus*, and *O. cyanea* display  
extreme semelparity (Ikeda et al., 1993; Rocha et al., 2001), while *Nautilus* spp. show  
extreme perennial-iteroparity (Ward, 1983, 1987). However, other cephalopods,  
including *Octopus chierchiae*, *Sthenoteuthis oualaniensis*, and *Dosidicus gigas* show  
varying degrees of facultative iteroparity (Nesis, 1996; Laptikhovsky, 1998, 1999; Rocha  
et al., 2001), while still others, including *Sepia officinalis*, *Loligo vulgaris*, *L. bleekeri*, *L.*  
*forbesi*, and *Ilex coindetii* show facultative semelparity, and, in the case of *S. officinalis*, a  
strikingly variable duration of reproduction (Boletzky, 1987, 1988; Baeg et al., 1993;  
Gonzalez, 1994; Gonzalez and Guerra, 1996; Rocha and Guerra, 1996; Melo and Sauer,  
1999). Furthermore, in many of these species key traits—such as the timing and duration  
of reproduction—show substantial dependence on environmental effects (Rocha et al.,  
2001). Similar lability in these traits is also present in other clades, including both  
angiosperms and animals (see: Maltby and Calow, 1986; Tallamy and Brown, 1999;  
Hautekèete et al., 2001; Crespi and Teo, 2002; Varela-Lasheras and Van Dooren, 2014).  
Thus, because evolutionary change from one mode of parity to another is a ubiquitous  
life-history transition, accurately characterizing parity as a life-history variable of interest  
may prove crucial to accounting for the adaptiveness of life-history strategies.

484

## **(2) Understanding the Evolution of Semelparous and Iteroparous**

### **486 Strategies in Light of the Continuous Conception of Parity**

What changes should be made in light of the evidence that parity is a continuous  
 488 trait? In this section I will focus on three main recommendations. First, I provide a short  
 discussion of how seasonality should not be conflated with mode of parity. Second, I  
 490 discuss the necessity of developing new mathematical modelling approaches that treat  
 parity as a continuous variable. This is not simple, since parity itself is a composite trait,  
 492 and relies on the coordination of many biological functions at once. Third, I discuss why  
 ecologists should ground future studies of adaptive life history strategies in mechanistic  
 494 details derived from genetic studies of continuously-varying life history traits underlying  
 reproduction and, consequently, parity. These recommendations should improve both the  
 496 validity and reliability of predictive models of life-history evolution, while  
 simultaneously providing a framework for interpreting empirical findings regarding the  
 498 expression of reproductive effort through time.

### **500 2.1 – Seasonality and Mode of Parity**

One major implication of treating parity as a continuous variable is that this  
 502 reconception allows us to distinguish between parity and seasonality. Parity describes the  
 concentration or diffusion of reproductive effort in time, which is distinct from the  
 504 question of seasonal reproduction—i.e. how organisms should distribute reproductive

effort among seasons, when seasonal cycles determine the favourability of establishment, growth, and reproductive conditions (Cole, 1954; Charnov and Schaffer, 1973; Schaffer, 1974b; Schaffer and Gadgil, 1975; Calow, 1979; Young, 1981; Bulmer, 1994; Evans et al., 2005; Ranta et al., 2007). It is, of course, clear that seasonality is related to parity. Insofar as an annual-semelparous organism is defined by the fact that it has a single reproductive episode that occurs within one year, it is likely to experience selection for strategies that optimize its reproductive schedule relative to season-specific environmental effects; this means that an annual-semelparous organism is more likely to show predictable seasonal patterns than a perennial-iteroparous congener that can escape a poor season by overwintering. However, the explanatory power of such seasonal adaptations may be much weaker when we compare a fast-reproducing semelparous organism with a slower-reproducing semelparous congener, or when we compare an iteroparous strategy where reproductive effort is distributed over two seasons with another where reproductive effort is distributed among ten seasons. Seasonal effects are likely to supervene on reproduction whenever regular intervals occur that have an impact on the favourability of reproduction. Thus it may be more fruitful to understand annuality and perenniality as strategies defined by the “digitization” of reproduction in response to seasonality. The advantage of this approach is that it makes it easier to understand flexible life histories, regardless of whether a species is semelparous or iteroparous.

There is widespread empirical evidence that seasonality and parity can vary independently. One common pattern is integer changes in voltinism among organisms that share a common mode of parity. For example, the Muga silkworm (*Antheraea assamensis*) is semelparous and multivoltine throughout its natural range (from India to



528 Borneo). This species produces up to 6 generations per year, with the number of  
reproductive cycles depending on length of the season (Singh and Singh, 1998; Ghorai et  
530 al., 2009). However, the closely related Chinese tussar silkmoth, *Antheraea pernyi*, is  
bivoltine at the southern margins of its range, but is univoltine in northern China and  
532 Korea. Moreover, this continuous variation in voltinism along an ecological cline is due  
to continuous variation in environment-dependent biogenic monoamine production in the  
534 brains of diapause pupae (Fukuda, 1953; Matsumoto and Takeda, 2002; Liu et al., 2010).  
Life histories also vary continuously among populations of the wild silkmoth (*Bombyx*  
536 *mandarina*) and its domesticated counterpart (*Bombyx mori*), where populations in colder  
climates (e.g. European Russia) are univoltine, whereas those in China and Korea are  
538 bivoltine or multivoltine (Xia et al., 2009). Similar examples can also be found in  
crucifers (Williams and Hill, 1986; Springthorpe and Penfield, 2015), orchids (Chase et  
540 al., 2005), freshwater molluscs (Mackie and Flippance, 1983; McMahon and Bogan,  
2001), and *Centaurea* (Asteraceae; Acker et al., 2014), among others. In each of these  
542 systems, a distinct continuum of reproductive strategies despite the supervening effect of  
seasonality is readily observable. Additionally, new models are being developed that  
544 consider generation length independently from parity (Waples, 2016). Thus we can easily  
tease apart the question of whether reproduction is concentrated in time—i.e. whether a  
546 given species is semelparous—from the question of whether seasonality requires that, in  
temperate climates, late-reproducing individuals should enter diapause rather than  
548 reproduce immediately.

## 550    **2.2 – Mathematical Modelling of Parity**

552            A second problem facing life history theory is the challenge of making new  
mathematical models that account for the continuity of modes of parity. Although  
empirical studies of many taxa support the continuous conception of parity, the evolution  
554    of different modes of parity from one another has generally been explained by  
demographic models that compare the special case where annual-semelparous and  
556    perennial-iteroparous strategies have different demographic implications. This means that  
mathematical models that incorporate the assumption that there is a discrete difference  
558    between semelparous and iteroparous strategies may not be able to account for the real  
eco-evolutionary dynamics of the reproductive behaviour of many organisms that do not  
560    show either annual-semelparous or perennial-iteroparous modes of parity, or the  
reproductive behaviours of species or populations that display continuous differences in  
562    parity. To develop a general model that can account for all modes of parity as adaptive  
responses to environmental conditions should, as an axiom, treat parity as a continuous  
564    trait, and should be able to explain both the evolution of semelparous strategies from  
iteroparous ones (or vice versa) as well as the adaptive value of intermediate modes of  
566    parity. In this section I argue that dynamic mathematical models that integrate molecular  
data with demographic factors are the best candidates to explain the evolution of different  
568    modes of parity. In addition, extant mathematical models used to explain the adaptive  
differences between semelparous and iteroparous life histories—or to calculate “optimal”  
570    trait values for distinct semelparous-annual and iteroparous-perennial strategies—can and  
should be redesigned to incorporate a continuum of possible modes of parity.

These new models will have to build on and learn from a considerable body of existing models detailing the eco-evolutionary dynamics of semelparous and iteroparous life history strategies. Early conceptual and mathematical models of optimal semelparous reproduction were generally simple, deterministic, and were designed to predict a single “threshold” value that optimized life history characters such as size at first reproduction (Bell, 1980; Young, 1981). Threshold models of this type include senescence-threshold models based on the Penna aging model (Piñol and Banzon, 2011), as well as development-threshold models such as age-structured life history models. Age-structured models treat age at reproduction, and hence parity, as a discrete variable, and assess the evolutionary consequences of the degree of overlap between juvenile (i.e. prereproductive) and adult (reproductive) classes in a population (Wikan, 2012). Among the best known of these are Leslie models, which predict either few evolutionary stable states for semelparous organisms (Cushing, 2009, 2015; Cushing and Henson, 2012; Cushing and Stump, 2013) or even that populations should consist entirely of individuals of a given age class (Rudnicki and Wiczorek, 2014). Still other threshold models make similar predictions for survival traits (Da-Silva et al., 2008).

However, despite rare exceptions (e.g. Lesica and Young, 2005), threshold models generally fail to adequately predict reproductive phenotypes in field systems, prompting some authors to emphasize the importance of making fewer assumptions that contradict “real” life-history parameters—e.g. Burd et al. (2006) note that “empirical attention to norms of reaction across growth environments will be a more profitable approach than investigation of size thresholds per se”. That is, for short-lived semelparous species (and some long-lived semelparous species: see Rose et al., 2002),

the impact of stochastic variation is substantial, and of equal or greater importance than

the global optimum predicted by deterministic models (Rees et al., 1999). Furthermore,

Rees et al. (1999) show that that deterministic age-structured models, which rest on the

assumption that parity is discrete, consistently overestimate time at first reproduction in monocarpic plants. Empirical evidence showing a wide and highly variable range of

reproductive phenotypes in natural populations (e.g. Marshall and Keough, 2007) has prompted the formulation of new modelling approaches that consider a range of

semelparous strategies in response to environmental heterogeneity as a source of

stochasticity that confounds threshold models that consider semelparous reproduction to

be optimized for a given environmental (reviewed in Metcalf et al., 2003).

Recent mathematical models also fall into several types, each with a particular

ecological focus. Integral projection models, which incorporate random fluctuations in environmental parameters related to reproduction, were developed to more accurately

predict time to first reproduction and size at reproduction, both in iteroparous species (e.g. Kuss et al., 2008) and in semelparous species with a prolonged semelparous

reproductive episode (e.g. Rees et al., 1999; Ellner and Rees, 2006; Rees et al. 1999;

Sletvold 2005). Time-lagged models integral projection models attempt to account for the

temporal discounting of reproductive value as well as size-specific effects on

reproductive effort (Kuss et al., 2008). Newer age-structured stochastic models

incorporate continuous variation in life history traits to predict optimal timing of

reproduction; while these resemble earlier models that treat parity wholly as a discrete

variable, the life-history traits in these models are treated continuously (Oizumi and

Takada, 2013; Oizumi, 2014; Davison and Satterthwaite, 2016).

Several recent models have been developed to predict reproductive trait values given other (measured or measurable) life history parameters. This modelling methodology is intuitive and compatible with the idea that parity is a continuous trait. For example, Kindsvater et al (2016) used a stage-structured model to assess the degree to which trait covariation constrained life history adaptation in salmonids. Other kinds of data-driven models fall into two main types: (1) models that highlight the importance of phenotypically plastic reaction norms as maximizing fitness despite stochastic variability in environment (e.g. Burd et al., 2006); and (2) models that emphasize the innate variability in reproductive characters within species (e.g. Drouineau et al., 2014; Austen et al., 2015). Both of these ideas may be useful in modelling selective pressures on a continuum of modes of parity. Moreover, rather than using a single model to characterize semelparous investment in flowers and offspring, authors are now proposing a ‘meta-modelling’ approach to annual plant reproduction, recognizing that semelparous reproduction can be fine-tuned by natural selection through phenotypic plasticity (Hughes and Simons, 2014a). However, despite the success of some of these new models, as yet they still suffer from a relative paucity of data relative to other areas of life-history theory. When discussing models designed to predict the optimal timing of the initiation of reproduction, Metcalf et al. (2003) wrote that, “a glaring inconsistency between the [life history] models and the data is that all models predict a specific threshold flowering condition...but data from natural population show a graded response”.

One class of model that may prove to be useful in modelling the allocation of reproductive effort over time are dynamic state variable models (DSVMs). DSVMs are powerful dynamic optimization models used to characterize mechanistic relationships in

ecology, and have the benefit of being able to be solved computationally (Clark and  
642 Mangel, 2000). Developing a DSVM can offer insight into the relative impact of  
underlying causal processes (in this case, the underlying patterns of genetic regulation of  
644 reproductive traits) on a state variable of interest (in this case, total plant fitness). Because  
the model follows the value of a state variable, the effects of multiple fitness components  
646 can be considered at once. Moreover, by parameterizing a DVSM with phenotypic data,  
ecologists can determine the additive and multiplicative contributions of variation at  
648 different gene loci, or between related phenotypes of interest. This is an important  
advantage insofar as continuous models of parity should, where possible include  
650 mechanistic detail. DSVMs are compatible with this approach: they can integrate a wide  
range of functional, spatial, structural, behavioural, or environmental limitations  
652 constraining investment in reproduction, and can generate testable predictions by  
determining optimal reproductive decision schedules (e.g. Yerkes and Koops, 1999;  
654 Skubic et al., 2004; Peterson and Roitberg, 2010).

### 656 **2.3 - Molecular Regulation of Parity**

The third implication of understanding parity as a continuously varying trait is  
658 that further study of parity should be rooted in mechanistic detail, and identifying the  
mechanistic basis of different modes of parity (e.g. the contributions of individual genes  
660 and/or molecular pathways responsible for initiating and continuing reproduction) should  
be an important priority for evolutionary ecology. Integrating theoretical ecology with  
662 molecular biological data was not possible when early life-history models were

developed, but since parity is determined by the onset and completion of reproductive  
 664 episodes, and recent advances in molecular ecology have made it possible to understand  
 the physiological and genetic basis of these events in many systems, this is, in many  
 666 systems, an achievable goal. Numerous examples of continuously-expressed  
 physiological processes result in continuous patterns of reproduction, and hence support  
 668 the continuous conception of parity (Table 3). In this section, I will explain how parsing  
 out the contributions of a single gene can improve our understanding of how modes of  
 670 parity can vary continuously. To do so, I will discuss an important example: the control  
 of the initiation of flowering in response to vernalization as it is regulated by  
 672 FLOWERING LOCUS C (*FLC*) and its orthologues in the Brassicaceae. I discuss two  
 such cases: (1) FLC regulation of vernalization response in *Arabidopsis thaliana*, a  
 674 semelparous annual; and (2) PEP1 regulation of vernalization response in *Arabis alpina*,  
 an iteroparous perennial.

676 In *Arabidopsis*, continuous variation in parity –i.e. the timing of floral initiation  
 and the duration of flowering—is determined by continuous expression of flowering-time  
 678 genes, including *FLOWERING LOCUS T* (*FT*) (Kardailsky, 1999; Yanovsky and Kay,  
 2002; Kotake et al., 2003; Imaizumi and Kay, 2006; Turck et al., 2008; Simon et al.,  
 680 2015), *FRIGIDA* (*FRI*) (Johanson et al., 2000; Le Corre et al., 2002; Michaels et al.,  
 2004; Stinchcombe et al., 2004; Shindo et al., 2005; Schläppi, 2006), *FLOWERING*  
 682 *LOCUS C* (Coupland, 1995; Amasino, 1996; Michaels and Amasino, 1999; Sheldon et  
 al., 2000; Michaels et al., 2003, 2004; Bastow et al., 2004; Imaizumi and Kay, 2006; Kim  
 684 et al., 2007; Chiang et al., 2009), *GIGANTEA* (*GI*) (Fowler et al., 1999; Mizoguchi et al.,  
 2005; Jung et al., 2007), and *CONSTANS* (*CO*) (Redei, 1962; Putterill et al., 1995;

Koornneef et al., 1998; Samach et al., 2000; Suárez-López et al., 2001; Valverde et al., 2004). Through different pathways, *GI* and *CO* activate the floral integrator gene *FLOWERING LOCUS T (FT)*, which transcribes a protein that activates floral identity genes in the shoot apical meristem (Turck et al., 2008; Tiwari et al., 2010). In contrast, *FLC*—along with *FRI*, which regulates *FLC* transcription—represses flowering in the absence of vernalization.

Although much is known about the complex question of how flowering is induced, here I concentrate on *FLC*, since continuous differences in *FLC* expression cause continuous variation in the duration and timing of semelparous reproduction (Wilczek et al., 2009; Burghardt et al., 2015). This variation causes continuous differences in parity. For instance, throughout Europe, parity in wild populations of *Arabidopsis* seems strongly determined by climate and/or latitude: toward the colder margins of its range, in northern Finland, plants show a fast-cycling summer semelparous annual life history, while populations near the Mediterranean show a winter annual life history, and populations in intermediate locations (e.g. the UK) display intermediate life histories (Thompson, 1994; Méndez-Vigo et al., 2011; Ågren and Schemske, 2012). Lab studies have identified *FLC* as the mechanism responsible for this life-history variation. For example, Wilczek et al. (2009) introgressed a functional *FRI* allele into *A. thaliana* ecotypes with nonfunctional alleles. They predicted that this genetic modification—which causes the upregulation of *FLC*—would see plants transition from a summer-annual to winter-annual life history. Instead, plants with functional *FRI* alleles flowered only 10 days later than those with nonfunctional *FRI* alleles, causing the authors to note that their results “suggest that *A. thaliana* ecotypes cannot simply be divided into two



discrete classes of winter-annual and rapid-cycling genotypes. Rather, most ecotypes may be capable of both life histories” (p. 933). This prediction is consistent with recent data from studies of the impact of *FLC* on the life histories of *A. thaliana* ecotypes sourced from different parts of its native range. While populations varying at the *FLC* locus show substantial local adaptation with respect to important life history traits—including those, such as length of duration of reproduction, which underlie mode of parity—most ecotypes adopt new life histories when translocated to radically different environments (Ågren and Schemske, 2012; Dittmar et al., 2014; Ågren et al., 2016; Postma and Ågren, 2016).

Where the prevalence of different *FLC* alleles differs between populations, differential expression of *FLC* can result in different flowering phenologies, and even different modes of parity (Johanson et al., 2000; Michaels et al., 2004; Schläppli, 2006; Banta and Purugganan, 2011). This is likely an adaptive response; life-history models of the natural genetic variation at the *FLC* and *FRI* loci have shown that *FLC* expression explains a relatively high level of variation in fitness (Donohue et al., 2014; Burghardt et al., 2015; Springthorpe and Penfield, 2015). Moreover, empirical studies suggest that such fitness differences may account for the latitudinal cline in *Arabidopsis* life history found in natural populations (Caicedo et al., 2004). Thus it seems that local adaptation of different modes of parity result from populations experiencing stabilizing selection for climate-appropriate *FLC* alleles (Postma and Ågren, 2016).

While fitness differences are tightly linked to phenotypic variation, major plant phenotypes such as flowering phenology are highly plastic in *Arabidopsis*. The genetic

and epigenetic regulation of *FLC* regulate the timing of important life-history transitions, determining a plant's reproductive schedule, and hence its mode of parity (Albani and Coupland, 2010; Turck and Coupland, 2014). However, environmental factors such as seed maturation and germination temperatures can interact with plant genotypes to produce “clusters” of phenotypically similar, yet genotypically distinct, plant phenologies (Burghardt et al., 2016). Environmental variation can therefore facilitate the adoption of multiple flowering phenologies (e.g. summer annual, winter annual, rapid cycling, etc.)—and thus modes of parity—from a single *Arabidopsis* ecotype (Simpson and Dean, 2002; Méndez-Vigo et al., 2011).

The relationship between *FLC* and variation in mode of parity is best understood in *Arabidopsis*, continuous variation in parity arising from response to vernalization has also been identified in the confamilial species *Arabis alpina*. *PERPETUAL FLOWERING 1 (PEP1)*, the orthologue of *FLC* in *A. alpina* (Wang, Farrona, Vincent, Joecker, et al., 2009), is responsible for regulating vernalization response. In *Arabidopsis*, *FLC* confers a obligate vernalization requirement on individuals; thus flowering is not possible until plants experience winter temperatures, which causes chromatin remodeling that prevents *FLC* transcription (Sheldon et al., 2000; Bastow et al., 2004). *PEP1* also confers an obligate vernalization requirement to *A. alpina*, however this effect is (seasonally) temperature-dependent. That is, in the Pajares ecotype, *PEP1* transcription is temporarily repressed by low temperatures, mediated by the continuous expression of *COOLAIR*-family antisense RNAs produced in response to cold (Wang, Farrona, Vincent, Joecker, et al., 2009; Albani et al., 2012; Castaings et al., 2014a), and thus facilitating the regular alternation of vegetative and reproductive phases that characterize iteroparous-perennial

life histories. Like *FLC*, considerable natural variation exists at the *PEP1* locus—most natural *A. alpina* ecotypes have a functional *PEP1* allele, and under controlled conditions restrict flowering duration, although some accessions lack a functional *PEP1* allele, and thus continuously flower without vernalization (Torang et al., 2015). That *PEP1* alone is responsible for this phenotype has been confirmed using mutant lines (Wang, Farrona, Vincent, Joecker, et al., 2009; Wang et al., 2011; Albani et al., 2012; Bergonzi et al., 2013). However, this transition is continuous rather than discrete, since the degree of *PEP1* suppression depends both on *PEP1* allele present in the accession as well as the duration of vernalization.

Thus, in both *Arabidopsis thaliana* and *Arabis alpina* (among other Brassicaceae spp.), parity is linked to genetic variation at the *FLC/PEP1* locus, and alleles from different, locally-adapted ecotypes show a range of distinct phenotypes (Aikawa et al., 2010; Kemi et al., 2013; Zhou et al., 2013). Moreover, *FLC* itself is subject to a number of regulatory mechanisms, some of which result in independent life history differences (Gazzani et al., 2003; Shindo et al., 2005, 2006). *FLC* example is not an isolated case, nor have genes linked closely to parity been discovered only in plant species; although a comprehensive description of all genes linked to parity in all species is beyond the scope of this article, a few notable examples from a variety of well-studied taxa are presented in Table 3. Genes linked to traits underlying parity, including reproductive maturation, stress response, reproductive phenology, and senescence, have been the subject of many informative reviews (see: McBlain et al., 1987; Finch and Rose, 1995; Tower, 1996; Danon et al., 2000; Eulgem et al., 2000; Rion and Kawecki, 2007; Garcia De Leaniz et al., 2007; Hall et al., 2007; Schneider and Wolf, 2008; Xin et al., 2008; Costantini et al.,

2008; Amasino, 2009; Thomas et al., 2009; Partridge, 2010; McCormick et al., 2011;

778 Selman and Withers, 2011; Kenyon, 2011; Thomas, 2013; Blümel et al., 2015; Wang et al., 2015).

780

### 3 – Conclusion

782 We still know far too little about why the evolutionary transition from semelparity to iteroparity (or vice versa) is as common as it is, or under which ecological conditions  
784 intermediate strategies—such as facultative semelparity—will thrive. While models rooted in the conception of parity as a binary trait do a good job of accounting for the  
786 fitness differences between discrete semelparous-annual and iteroparous perennial alternative strategies, systems characterized by only these possibilities—and no others—  
788 are special cases. In many cases the life history question at hand is more subtle: why does a given species evolve a facultative strategy, or why does another show intraspecific  
790 variation in the length of the semelparous reproductive episode? In such cases—which are not as rare as they were when the adaptiveness of parity was first being investigated—  
792 the discrete conception of parity is a impractical oversimplification.

Thus the main conclusion of this work is that parity should be treated as a  
794 continuous trait rather than a discrete one. This reconception of parity offers several notable advantages for life-history theory. First, treating parity as a continuous trait  
796 allows us to treat parity as a distinct life history syndrome, itself the result of correlated selection on a suite of traits, that may show finely-graded correlated variation within

798 species or populations. This is advantageous because parity is a composite trait, and the  
act of reproducing at a given time, of a given duration, etc. involves the recruitment and  
800 coordination of many independent parts, each of which may affect the expression of  
others. An integrative approach has proven to be valuable in studying other multifactorial  
802 composite traits (e.g. Buoro and Carlson, 2014). Furthermore, whether they share  
common genetic basis or not, obvious or visible life history characters may not be  
804 primary targets of selection, and evolution of such traits may occur as an epiphenomenon  
of selection on (one or many) other apparent or non-apparent underlying traits. Second,  
806 developing accurate mathematical and mechanistic models designed to explain fitness  
differences between life histories—as well as to understand the nature of the costs and  
808 trade-offs associated with initiating and completing reproductive episodes—will be best  
understood by acknowledging that living systems show a continuum of reproductive  
810 strategies between annual-semelparity and perennial-iteroparity. Considering only  
annual-semelparity and perennial-iteroparity as discrete alternatives, although a useful  
812 simplification for many models, is biologically accurate only in a limited number of  
special cases, and the continuous conception of parity is more likely to approximate the  
814 eco-evolutionary dynamics of natural systems that show intraspecific or plastic variation  
in the expression of parity. Finally, treating parity as a continuous variable that represents  
816 a syndrome of associated traits may make it easier to integrate life history studies with  
mechanistic details deriving from molecular ecology, insofar as composite life history  
818 traits such as parity are unlikely to be the result of a simple presence or absence of a  
single gene or allele. Instead, parity is likely to be the product of complex systems of  
820 genetic, translational, and post-translational regulation.

822           There are important issues to consider for further work on a continuum of modes  
of parity. First, life-history theorists should make their language clearer and tighten  
824   definitions, in order to avoid confusion and improve the effectiveness of evolutionary  
explanations. Parity, the degree of temporal concentration or diffusion of reproductive  
826   effort in time, is a distinct evolutionary question from whether organisms reproduce in  
one year or in more than one year (“classic” semelparity and iteroparity), or whether or  
828   not organisms have a distinct life cycle that is completed according to an annual cycle or  
not (annuality and perenniality). Consider two annual plants as an example: the  
830   concentration of reproductive effort in time—i.e. realizing a hyper-semelparous (or  
uniparous) reproductive strategy—is a different strategy than spreading reproduction out  
832   over many months, even if both strategies are completed within a single year. Moreover,  
the evolutionary and mechanistic reasons that account for seasonal behaviours—e.g.  
834   annuality and perenniality—are distinct from those that account for the degree of parity.  
Making these distinctions clear, both in language and in predictive models, should be an  
836   important priority for evolutionary ecologists interested in the problem of parity.

          Other important issues exist as well. A second question is that the extant body of  
838   theory—much of which describes various special cases in which demographic or  
environmental factors confer a fitness advantage on an annual-semelparous strategy over  
840   a perennial-iteroparous one (or vice versa)—should be preserved and reworked into a  
more general explanation of how factors affecting fitness through time determine optimal  
842   patterns of the distribution of risk in and among seasons. More general models should

consider a range of possible modes of parity. A third issue is that reproductive characters  
of long-lived semelparous species are generally easier to model than characters of short-  
lived species, and while environmental heterogeneity plays an important role determining  
the optimal allocation of reproductive effort in annual semelparous species, long-lived  
semelparous species can afford to be “choosier” about when they reproduce, and  
therefore have been shown to more closely approximate model predictions. This may be  
especially true when, as in many long-lived perennial-iteroparous species, the  
relationship between age and cost of reproduction is nonlinear. Thus, developing models  
that accurately model the fitness dynamics of short-lived semelparous species should be a  
priority. Fourth, intraspecific differences in life-history strategy, particularly between  
populations inhabiting dissimilar environments, can confound the degree to which  
empirical studies can test predictions of *a priori* models or parameterize them. Additional  
empirical comparisons of different modes of parity should therefore be as general as  
possible, and incorporate as many points along the continuum of modes of parity as  
possible, in order to maximize generalizability. Last, new models of modes of parity  
should, on a system-by-system basis, attempt to account for the underlying mechanisms  
that determine the timing and nature of the allocation of reproductive effort. Because  
modes are composite traits, integrating the molecular mechanisms that underlie many  
traits into a single model is not a simple task. Moreover, even orthologous genes with  
may have dramatically different effects in closely related species, and this  
unpredictability may considerably complicate the process of mechanistically modelling of  
modes of parity. Despite the considerable challenge that it poses, integrating molecular  
ecological studies of the fitness consequences of different genotypes with theoretical

866 mathematical models should be an important priority in the medium- to long-term future,  
and would represent an important area of consilience between molecular and theoretical  
868 ecology.

## 870 **ACKNOWLEDGEMENTS**

I would like to thank Andrew Simons, Maria Albani, Wim Soppe, and Amanda Feeney  
872 for their assistance in developing the ideas in this manuscript. This work was supported  
by a Postdoctoral Fellowship from the Natural Sciences and Engineering Research  
874 Council and a Humboldt Research Fellowship from the Alexander von Humboldt  
Foundation.



| Plant Order       | Families | Estimated Number of Species | Class | Exemplar Species               | Semelparous Species Present | Iteroparous Species Present | Notes                                                                                                                                  | Reference                                                                                                                                                                                                                                                                                         |
|-------------------|----------|-----------------------------|-------|--------------------------------|-----------------------------|-----------------------------|----------------------------------------------------------------------------------------------------------------------------------------|---------------------------------------------------------------------------------------------------------------------------------------------------------------------------------------------------------------------------------------------------------------------------------------------------|
| Acorales          | 1        | 2                           | M     | <i>Acorus calamus</i>          |                             | x                           | -                                                                                                                                      | (Kew World Checklist)                                                                                                                                                                                                                                                                             |
| Alismatales       | 13       | 4500                        | M     | <i>Anthurium andraeanum</i>    | x                           | x                           | facultative semelparity                                                                                                                | (Haggard and Tiffney, 1997; Haston et al., 2009)                                                                                                                                                                                                                                                  |
| Amborellales      | 1        | 1                           | -     | <i>Amborella trichopoda</i>    | x                           |                             | -                                                                                                                                      | (Kew World Checklist, 2017)                                                                                                                                                                                                                                                                       |
| Apiales           | 7        | 5500                        | D     | <i>Daucus carota</i>           | x                           | x                           | facultative semelparity in <i>Heracleum</i> spp.                                                                                       | (Chandler and Plunkett, 2004; Kew World Checklist, 2017)                                                                                                                                                                                                                                          |
| Aquifoliales      | 5        | 600                         | D     | <i>Ilex aquifolium</i>         | x                           | x                           | -                                                                                                                                      | (Kew World Checklist, 2017)                                                                                                                                                                                                                                                                       |
| Arecales          | 1        | 2600                        | M     | <i>Cocos nucifera</i>          | x                           | x                           | facultative semelparity in <i>Rhopalostylis sapida</i>                                                                                 | (Silvertown et al., 1993)                                                                                                                                                                                                                                                                         |
| Asparagales       | 14       | 36000                       | M     | <i>Asparagus officinalis</i>   | x                           | x                           | facultative semelparity in <i>Yucca whipplei</i>                                                                                       | (Keeley et al., 1986)                                                                                                                                                                                                                                                                             |
| Asterales         | 11       | 27500                       | D     | <i>Helianthus annuus</i>       | x                           | x                           | facultative iteroparity in <i>Lobelia inflata</i>                                                                                      | (Hughes and Simons, 2014b; c)                                                                                                                                                                                                                                                                     |
| Austrobaileyales  | 3        | 100                         | NA    | <i>Illicium verum</i>          |                             | x                           | -                                                                                                                                      | (Palmer et al., 2004)                                                                                                                                                                                                                                                                             |
| Berberidopsidales | 2        | 6                           | D     | <i>Berberidopsis corallina</i> |                             | x                           | -                                                                                                                                      | (Kew World Checklist, 2017)                                                                                                                                                                                                                                                                       |
| Brassicales       | 17       | 4500                        | D     | <i>Brassica oleracea</i>       | x                           | x                           | "perpetual flowering" under genetic control ( <i>Arabis alpina</i> ); phenotypically plastic semelparity in <i>Brassica campestris</i> | (Biswas and Mandal, 1987; Wang, Farrona, Vincent, Fornara, et al., 2009; Kew World Checklist, 2017) Albani PEP1; 2: Biswas, A. K., and S. K. Mandal. "Regulation of monocarpic senescence of <i>Brassica campestris</i> by the developing pods." <i>Physiologia Plantarum</i> 71.1 (1987): 89-94. |
| Bruniales         | 2        | 80                          | D     | <i>Desfontainia spinosa</i>    | x                           | x                           | fire-dependent facultative parity (Bruniaceae spp.)                                                                                    | (van Wilgen and Forsyth, 1992) Van Wilgen and Forsyth (1992)                                                                                                                                                                                                                                      |
| Buxales           | 3        | 120                         | D     | <i>Buxus sempervirens</i>      |                             | x                           | -                                                                                                                                      | (Kew World Checklist, 2017)                                                                                                                                                                                                                                                                       |

|                 |    |       |   |                                |   |   |                                                                                                                                                                            |                                   |
|-----------------|----|-------|---|--------------------------------|---|---|----------------------------------------------------------------------------------------------------------------------------------------------------------------------------|-----------------------------------|
| Canellales      | 2  | 136   | D | <i>Canella winteriana</i>      | x | x | -                                                                                                                                                                          | (Kew World Checklist, 2017)       |
| Caryophyllales  | 33 | 11000 | D | <i>Silene dioica</i>           | x | x | Plasticity of iteroparous reproduction in <i>Ferocactus wislizeni</i> ; variation in many long-lived Cactaceae perennial spp.; similar changes in Buckwheat (Polygonaceae) | (Bowers, 2000; Song et al., 2013) |
| Celastrales     | 2  | 1300  | D | <i>Celastrus orbiculatus</i>   |   | x | -                                                                                                                                                                          | (Kew World Checklist, 2017)       |
| Ceratophyllales | 1  | 10    | - | <i>Ceratophyllum submersum</i> | x | x | plasticity of iteroparous life histories in European hornworts                                                                                                             | (Bisang et al., 2008)             |
| Chloranthales   | 1  | 75    | - | <i>Sarcandra glabra</i>        |   | x | -                                                                                                                                                                          | (Kew World Checklist, 2017)       |
| Commelinales    | 5  | 850   | M | <i>Commelina communis</i>      | x | x | Phenotypically plastic semelparity in genus <i>Commelina</i> ; varies from near-uniparity to extended semelparity                                                          | (Faden, 1993, 2006)               |
| Cornales        | 6  | 600   | D | <i>Hydrangea macrophylla</i>   | x | x | Facultative iteroparity in stickleaf spp.                                                                                                                                  | (Keeler, 1987)                    |
| Crossosomatales | 7  | 80    | D | <i>Crossosoma bigelovii</i>    |   | x |                                                                                                                                                                            | (Kew World Checklist, 2017)       |
| Cucurbitales    | 8  | 2600  | D | <i>Begonia obliqua</i>         | x | x | facultative iteroparity among cultivated begonias                                                                                                                          | (De Wilde, 2010)                  |
| Dilleniales     | 1  | 400   | D | <i>Hibbertia stellaris</i>     | x | x | facultative semelparity in <i>Hibbertia</i> spp                                                                                                                            | (Stebbins and Hoogland, 1976)     |
| Dioscoreales    | 3  | 1050  | M | <i>Dioscorea rotundata</i>     |   | x | -                                                                                                                                                                          | (Kew World Checklist, 2017)       |
| Dipsacales      | 2  | 1100  | D | <i>Lonicera periclymenum</i>   |   | x | -                                                                                                                                                                          | (Kew World Checklist, 2017)       |

|               |    |       |   |                               |   |   |                                                                                             |                                                              |
|---------------|----|-------|---|-------------------------------|---|---|---------------------------------------------------------------------------------------------|--------------------------------------------------------------|
| Ericales      | 25 | 11000 | D | <i>Vaccinium macrpacaron</i>  | x | x | Facultative semelparity and facultative iteroparity in <i>Impatiens</i> spp.                | (Vervoort et al., 2011)                                      |
| Escalloniales | 1  | 130   | D | <i>Escallonia bifida</i>      | x | x | -                                                                                           | (Kew World Checklist, 2017)                                  |
| Fabales       | 4  | 20000 | D | <i>Pisum sativum</i>          | x | x | facultative iteroparity in many spp.                                                        | (Nichols et al., 2007)                                       |
| Fagales       | 7  | 2000  | D | <i>Quercus alba</i>           |   | x | -                                                                                           | (Kew World Checklist, 2017)                                  |
| Garryales     | 2  | 18    | D | <i>Garrya congdonii</i>       |   | x | -                                                                                           | (Kew World Checklist, 2017)                                  |
| Gentianales   | 5  | 16000 | D | <i>Gentiana verna</i>         | x | x | plasticity of iteroparous reproduction in long lived perennial <i>Frasera caroliniensis</i> | (Threadgill et al., 1981)                                    |
| Geraniales    | 5  | 900   | D | <i>Geranium rotundifolium</i> | x | x | -                                                                                           | (Kew World Checklist, 2017)                                  |
| Gunnerales    | 2  | 55    | D | <i>Gunnera manicata</i>       | x | x | facultative semelparity in <i>Gunnera herteri</i>                                           | (Wanntorp et al., 2002)                                      |
| Huerteales    | 4  | 20    | D | <i>Huertia cubensis</i>       |   | x | -                                                                                           | (Kew World Checklist, 2017)                                  |
| Lamiales      | 20 | 24000 | D | <i>Lamium purpureum</i>       | x | x | -                                                                                           | (Kew World Checklist, 2017)                                  |
| Laurales      | 7  | 2500  | D | <i>Laurus nobilis</i>         |   | x | -                                                                                           | (Kew World Checklist, 2017)                                  |
| Liliales      | 10 | 1300  | M | <i>Lilium candidum</i>        | x | x | Many perennial Agave spp. have substantial phenotypic plasticity in parity                  | (Nobel, 1977; Arizaga and Ezcurra, 1995; Rocha et al., 2005) |
| Magnoliales   | 6  | 5000  | - | <i>Magnolia virginiana</i>    | x | x | -                                                                                           | (Kew World Checklist, 2017)                                  |
| Malpighiales  | 35 | 16000 | D | <i>Malpighia glabra</i>       | x | x | -                                                                                           | (Kew World Checklist, 2017)                                  |
| Malvales      | 9  | 6000  | D | <i>Malva sylvestris</i>       | x | x | -                                                                                           | (Kew World Checklist, 2017)                                  |
| Myrtales      | 9  | 11000 | D | <i>Myrtus communis</i>        | x | x | -                                                                                           | (Kew World Checklist, 2017)                                  |
| Nymphaeales   | 3  | 70    | - | <i>Nymphaea lotus</i>         |   | x | -                                                                                           | (Kew World Checklist, 2017)                                  |
| Oxalidales    | 7  | 1800  | D | <i>Oxalis acetosella</i>      | x | x | -                                                                                           | (Kew World Checklist, 2017)                                  |
| Pandanales    | 5  | 1300  | M | <i>Pandanus utilis</i>        |   | x | -                                                                                           | (Kew World Checklist, 2017)                                  |

|                 |    |       |   |                                 |   |   |                                                                                 |                                                          |
|-----------------|----|-------|---|---------------------------------|---|---|---------------------------------------------------------------------------------|----------------------------------------------------------|
| Paracryphiales  | 1  | 36    | D | <i>Paracryphia alticola</i>     |   | x | -                                                                               | (Kew World Checklist, 2017)                              |
| Petrosaviales   | 1  | 5     | M | <i>Petrosavia sakurail</i>      |   | x | -                                                                               | (Kew World Checklist, 2017)                              |
| Picramniales    | 1  | 65    | D | <i>Picramnia xalapensis</i>     |   | x | -                                                                               | (Kew World Checklist, 2017)                              |
| Piperales       | 4  | 4000  | - | <i>Piper nigrum</i>             | x | x | facultative semelparity<br>in <i>Piper pellucida</i>                            | (Wanke et al., 2006)                                     |
| Poales          | 16 | 18000 | M | <i>Zea mays</i>                 | x | x | facultative iteroparity<br>and variable iteroparity<br>in bamboo, wheat         | (Franklin, 2004; Montti et al., 2011; Baum et al., 2013) |
| Proteales       | 3  | 1000  | D | <i>Protea caffra</i>            |   | x | -                                                                               | (Kew World Checklist, 2017)                              |
| Ranunculales    | 7  | 2800  | D | <i>Ranunculus occidentalis</i>  | x | x | phenotypically plastic<br>parity in many<br><i>Meconopsis</i> spp.              | (Sulaiman and Babu, 1996)                                |
| Rosales         | 9  | 7700  | D | <i>Rosa blanda</i>              | x | x | -                                                                               | (Kew World Checklist, 2017)                              |
| Sabiales        | 1  | 100   | D | <i>Sabia campanulata</i>        |   | x | -                                                                               | (Kew World Checklist, 2017)                              |
| Santalales      | 7  | 1000  | D | <i>Santalum ellipticum</i>      |   | x | -                                                                               | (Kew World Checklist, 2017)                              |
| Sapindales      | 9  | 5700  | D | <i>Acer saccharum</i>           |   | x | -                                                                               | (Kew World Checklist, 2017)                              |
| Saxifragales    | 16 | 2500  | D | <i>Saxifraga stellaris</i>      | x | x | <i>Saxifraga longifolia</i><br>shows phenotypically<br>plastic parity           | (García, 2003)                                           |
| Solanales       | 5  | 4000  | D | <i>Solanum tuberosum</i>        | x | x | plasticity of long-term<br>monocarpic<br>reproduction in <i>Petunia</i><br>spp. | (Laroche and Bousquet, 1999)                             |
| Trochodendrales | 1  | 2     | D | <i>Trochodendron aralioides</i> |   | x | -                                                                               | (Kew World Checklist, 2017)                              |
| Vitales         | 1  | 770   | D | <i>Vitis vinifera</i>           |   | x | -                                                                               | (Kew World Checklist, 2017)                              |
| Zingiberales    | 8  | 2100  | D | <i>Zingiber officinale</i>      | x | x | plasticity of mode of<br>parity in <i>Ensete</i> spp.                           | (Kirchoff, 1992; Birmeta et al., 2004)                   |
| Zygophyllales   | 2  | 300   | D | <i>Zygophyllum album</i>        | x | x | -                                                                               | (Kew World Checklist, 2017)                              |

876 **Table 1.** Angiosperm orders show substantial diversity in mode of parity. Data is shown for all 59 plant orders from the APG III system. Class = (M) monocot or (D) dicot. Marks indicate whether the indicated reproductive strategy is present in that order.

| Focal Species                                | Clade      | Continuously varying traits identified              | Facultative Iteroparity | Facultative Semelparity | Continuous Variation in Parity | Phenotypically Plastic Parity | Reference                                              |
|----------------------------------------------|------------|-----------------------------------------------------|-------------------------|-------------------------|--------------------------------|-------------------------------|--------------------------------------------------------|
| <i>Acer negundo</i>                          | Angiosperm | timing of reproduction                              |                         |                         |                                | x                             | (Lamarque et al., 2015)                                |
| <i>Agave celsii</i> , <i>Agave difformis</i> | Angiosperm | timing of reproduction;<br>reproductive effort      |                         |                         | x                              | x                             | (Rocha et al., 2005)                                   |
| <i>Allogamus uncatus</i>                     | Insect     | timing of reproduction;<br>duration of reproduction |                         |                         | x                              | x                             | (Shama and Robinson, 2009)                             |
| <i>Alosa sapidissima</i>                     | Fish       | timing of reproduction; clutch size                 |                         | x                       | x                              | x                             | (Leggett and Carscadden, 1978)                         |
| <i>Amblyrhynchus cristatus</i>               | Reptile    | timing of reproduction                              |                         |                         | x                              | x                             | (Vitousek et al., 2010)                                |
| <i>Antechinus stuartii</i>                   | Mammal     | adult mortality                                     | x                       |                         | x                              |                               | (Fisher and Blomberg, 2011)                            |
| <i>Arabidopsis lyrata</i>                    | Angiosperm | timing of reproduction;<br>duration of reproduction |                         |                         | x                              |                               | (Remington et al., 2015)                               |
| <i>Arabis fecunda</i>                        | Angiosperm | reproductive effort                                 |                         |                         | x                              | x                             | (Lesica and Shelly, 1995)                              |
| <i>Bambusa narnhemica</i>                    | Angiosperm | timing of reproduction                              |                         |                         | x                              |                               | (Franklin, 2004)                                       |
| <i>Beta vulgaris</i>                         | Angiosperm | reproductive effort                                 |                         |                         |                                | x                             | (Letschert, 1993; Hautekèete et al., 2001, 2002, 2009) |
| <i>Boreogadus saida</i>                      | Fish       | adult mortality;<br>reproductive effort             |                         |                         | x                              |                               | (Nahrgang et al., 2014)                                |
| <i>Botryllus sclosseri</i>                   | Tunicate   | timing of reproduction, clutch size                 | x                       |                         | x                              | x                             | (Grosberg, 1988; Harvell and Grosberg, 1988)           |
| <i>Bradybaena pellucida</i>                  | Gastropod  | duration of reproduction                            |                         |                         | x                              | x                             | (Nyumura and Asami, 2015)                              |

|                                                                                                                                                                           |             |                                                  |   |   |   |   |                                                                 |
|---------------------------------------------------------------------------------------------------------------------------------------------------------------------------|-------------|--------------------------------------------------|---|---|---|---|-----------------------------------------------------------------|
| <i>Cynodonichthys brunneus</i> , <i>Cynodonichthys magdalenae</i> , <i>Cynodonichthys kuelpmanni</i> , <i>Anablepsoides immaculatus</i> , and <i>Laimosemion frenatus</i> | Fish        | timing of reproduction; diapause length          |   | x | x | x | (Varela-Lasheras and Van Dooren, 2014)                          |
| <i>Daphnia galeata</i>                                                                                                                                                    | Crustacean  | timing of reproduction                           |   |   | x | x | (Henning-Lucass et al., 2016)                                   |
| <i>Daucus carota</i>                                                                                                                                                      | Angiosperm  | timing of reproduction                           |   |   | x | x | (Lacey, 1988)                                                   |
| <i>Digitaria californica</i>                                                                                                                                              | Angiosperm  | juvenile mortality                               |   |   | x |   | (Smith et al., 2000)                                            |
| <i>Dosidicus gigas</i>                                                                                                                                                    | Mollusc     | timing of reproduction; duration of reproduction | x |   | x | x | (Hoving et al., 2013)                                           |
| <i>Emoia atroscostata</i>                                                                                                                                                 | Reptile     | timing of reproduction                           |   |   | x |   | (Alcala and Brown, 1967)                                        |
| <i>Erpobella octoculata</i>                                                                                                                                               | Leech       | adult mortality; reproductive effort             | x |   | x | x | (Maltby and Calow, 1986)                                        |
| <i>Erysimum capitatum</i>                                                                                                                                                 | Angiosperm  | timing of reproduction                           |   | x | x |   | (Kim and Donohue, 2011)                                         |
| <i>Eulamprus tympanum</i>                                                                                                                                                 | Reptile     | clutch size; timing of reproduction              |   |   | x | x | (Doughty and Shine, 1997)                                       |
| <i>Forficula auricularia</i>                                                                                                                                              | Insect      | timing of reproduction                           |   |   |   | x | (Meunier et al., 2012)                                          |
| <i>Fucus serratus</i> ; <i>Himanthalia elongata</i>                                                                                                                       | Algae       | duration of reproduction                         |   |   | x |   | (Brenchley et al., 1996)                                        |
| <i>Gaimardia bahamondei</i>                                                                                                                                               | Bivalve     | timing of reproduction; duration of reproduction | x |   | x | x | (Chaparro et al., 2011)                                         |
| <i>Galaxias maculatus</i>                                                                                                                                                 | Fish        | timing of reproduction                           | x |   |   | x | (Stevens et al., 2016)                                          |
| <i>Gasterosteus aculeatus</i>                                                                                                                                             | Stickleback | timing of reproduction; reproductive effort      |   | x | x | x | (Snyder, 1991; Bell and Foster, 1994; Baker et al., 2008, 2015) |
| <i>Gracilinanus microtarsus</i>                                                                                                                                           | Mammal      | male adult mortality                             | x |   | x | x | (Kraaijeveld et al., 2003; Martins et al., 2006)                |
| <i>Idiosepius pygmaeus</i>                                                                                                                                                | Cephalopod  | timing of reproduction                           | x |   | x |   | (Lewis and Choat, 1993; Nesis, 1996)                            |
| <i>Ligia cinerascens</i>                                                                                                                                                  | Crustacean  | adult mortality; timing of reproduction          | x | x | x | x | (Furota and Ito, 1999)                                          |

|                                                                                                                      |            |                                                  |   |   |   |   |                                                                 |
|----------------------------------------------------------------------------------------------------------------------|------------|--------------------------------------------------|---|---|---|---|-----------------------------------------------------------------|
| <i>Lobelia inflata</i>                                                                                               | Angiosperm | timing of reproduction; duration of reproduction | x |   | x | x | (Hughes and Simons, 2014 a,b,c)                                 |
| <i>Loligo vulgaris</i>                                                                                               | Cephalopod | timing of reproduction; clutch size              | x |   | x |   | (Melo and Sauer, 1999; Sauer et al., 1999)                      |
| <i>Mallotus villosus</i>                                                                                             | Fish       | adult mortality; timing of reproduction          |   | x | x | x | (Christiansen et al., 2008)                                     |
| <i>Marmosops paulensis</i>                                                                                           | Mammal     | female adult mortality                           | x |   | x | x | (Leiner et al., 2008)                                           |
| <i>Mimulus guttatus</i>                                                                                              | Angiosperm | duration of flowering                            |   |   | x | x | (Van Kleunen, 2007)                                             |
| <i>Misumena vatia</i>                                                                                                | Arachnid   | juvenile mortality                               |   |   | x | x | (Morse, 1994; Morse and Stephens, 1996)                         |
| <i>Nautilus</i> spp.                                                                                                 | Cephalopod | timing of reproduction; timing of senescence     | x |   | x | x | (Ward, 1983, 1987)                                              |
| <i>Oenothera deltoides</i> ; <i>Oenothera pallida</i>                                                                | Angiosperm | timing of reproduction; adult mortality          | x | x | x |   | (Evans et al., 2005)                                            |
| <i>Oncorhynchus mykiss</i>                                                                                           | Fish       | reproductive effort                              | x |   | x | x | (Seamons and Quinn, 2010)                                       |
| <i>Oncorhynchus nerka</i>                                                                                            | Fish       | timing of reproduction                           |   |   |   | x | (Hendry et al., 2004)                                           |
| <i>Oncorhynchus tshawytscha</i>                                                                                      | Fish       | adult mortality                                  | x |   |   | x | (Unwin et al., 1999)                                            |
| <i>Onopordum illyricum</i>                                                                                           | Angiosperm | timing of reproduction                           |   | x |   |   | (Rees et al., 1999)                                             |
| <i>Opisthoteuthis agassizii</i> , <i>Opisthoteuthis grimaldii</i> and <i>Grimpoteuthis glacialis</i>                 | Cephalopod | timing of reproduction; reproductive effort      |   |   | x |   | (Aldred et al., 1983; Villanueva, 1992; Vecchione et al., 1998) |
| <i>Panicum bisulcatum</i> , <i>Cyperus michelianus</i> , <i>Fimbristylis miliacea</i> , and <i>Eclipta prostrata</i> | Angiosperm | timing of reproduction; duration of reproduction |   |   | x | x | (Song et al., 2015)                                             |
| <i>Parantechnius apicalis</i>                                                                                        | Mammal     | adult mortality                                  |   | x |   | x | (Wolfe et al., 2004)                                            |
| <i>Plecoglossus altivelis</i>                                                                                        | Fish       | timing of reproduction; reproductive effort      | x |   | x | x | (Iguchi, 1996; Iguchi and Tsukamoto, 2001)                      |
| <i>Puya raimondii</i>                                                                                                | Angiosperm | reproductive effort                              |   | x | x |   | (Jabaily and Sytsma, 2013)                                      |
| <i>Rana arvalis</i>                                                                                                  | Frog       | timing of reproduction                           |   |   |   | x | (Richter-Boix et al., 2014)                                     |
| <i>Sasa senanensis</i> , <i>Sasa kurilensis</i> , and <i>Sasa palmata</i>                                            | Angiosperm | timing of reproduction; reproductive effort      | x | x |   | x | (Mizuki et al., 2014)                                           |

878  
880

|                                   |            |                                                                            |   |   |   |   |                                         |
|-----------------------------------|------------|----------------------------------------------------------------------------|---|---|---|---|-----------------------------------------|
| <i>Sepia officinalis</i>          | Cephalopod | adult mortality; timing of reproduction; clutch size; timing of senescence | x |   | x | x | (Boletzky, 1988; Rocha et al., 2001)    |
| <i>Stegodyphus lineatus</i>       | Arachnid   | adult mortality; timing of reproduction                                    |   |   | x | x | (Schneider and Lubin, 1997)             |
| <i>Sthenoteuthis oualaniensis</i> | Cephalopod | timing of reproduction                                                     | x |   |   |   | (Rocha et al., 2001)                    |
| <i>Strix uralensis</i>            | Bird       | timing of reproduction                                                     |   |   |   | x | (Brommer et al., 2012)                  |
| <i>Uta stansburiana</i>           | Reptile    | duration of reproduction,                                                  |   | x | x | x | (Tinkle, 1969)                          |
| <i>Verbascum thapsis</i>          | Angiosperm | timing of reproduction                                                     |   |   | x |   | (Reinartz, 1984)                        |
| <i>Wyeomyia smithii</i>           | Angiosperm | timing of reproduction                                                     |   |   | x | x | (Bradshaw, 1986)                        |
| <i>Xerolenta obvia</i>            | Gastropod  | timing of reproduction                                                     | x |   | x | x | (Lazaridou and Chatziioannou, 2005)     |
| <i>Xeropicta derbentina</i>       | Gastropod  | timing of reproduction                                                     | x |   | x | x | (Aubry et al., 2005; Kiss et al., 2005) |
| <i>Yucca whipplei</i>             | Angiosperm | reproductive effort                                                        |   | x | x |   | (Huxman and Loik, 1997)                 |

Table 2. Species known to display facultative semelparity, facultative iteroparity, a continuum of modes of parity, or phenotypic plasticity with respect to mode of parity.



| Study Organism                                     | Clade      | Gene /QTL                                                          | Traits                                                        | Reference                                                                                             |
|----------------------------------------------------|------------|--------------------------------------------------------------------|---------------------------------------------------------------|-------------------------------------------------------------------------------------------------------|
| <i>Actinidia chinensis</i>                         | Angiosperm | carotenoid cleavage dioxygenase 8 (CCD8)                           | branch development; timing of senescence                      | (Ledger et al., 2010)                                                                                 |
| <i>Aedes aegypti</i> , <i>A. albopictus</i>        | Insect     | cytochrome P450 gene 6Z6 (CYP6Z6), 6N12 (CYP6N12), and M9 (CYP9M9) | juvenile mortality                                            | (Kim and Muturi, 2012)                                                                                |
| <i>Arabidopsis lyrata</i>                          | Angiosperm | LG3, LG4                                                           | developmental timing of reproductive transitions; branchiness | (Leinonen et al., 2013; Remington et al., 2013, 2015)                                                 |
| <i>Arabidopsis thaliana</i>                        | Angiosperm | Early day-length insensitive (EDI)                                 | response to vernalization; timing of flowering                | (Alonso-Blanco et al., 1998)                                                                          |
| <i>Arabidopsis thaliana</i>                        | Angiosperm | FLC                                                                | timing of initiation of reproduction                          | (Bastow et al., 2004; Caicedo et al., 2004; Kim et al., 2007; Aikawa et al., 2010; Deng et al., 2011) |
| <i>Arabidopsis thaliana</i>                        | Angiosperm | FRI                                                                | timing of initiation of reproduction                          | (Le Corre et al., 2002; Stinchcombe et al., 2004; Shindo et al., 2005; Méndez-Vigo et al., 2011)      |
| <i>Arabidopsis thaliana</i>                        | Angiosperm | DOG1                                                               | seed dormancy; timing of initiation of reproduction           | (Chiang et al., 2011, 2013)                                                                           |
| <i>Arabidopsis thaliana</i> ; <i>Pisum sativum</i> | Angiosperm | More axillary growth (MAX4); Ramosus1 (RMS1)                       | axillary shoot outgrowth; timing of outgrowth                 | (Sorefan et al., 2003)                                                                                |
| <i>Arabis alpina</i>                               | Angiosperm | PEP1                                                               | timing of initiation of reproduction; perenniality            | (Wang, Farrona, Vincent, Fornara, et al., 2009; Albani et al., 2012; Castaings et al., 2014b)         |
| <i>Brachionus plicatilis</i>                       | Rotifer    | small heat shock protein 1 (shsp-1), shsp-2, shsp-3, shsp-4        | dormancy; juvenile mortality                                  | (Denekamp et al., 2011)                                                                               |
| <i>Colias eutytheme</i> , <i>C. philodice</i>      | Insect     | phosphoglucose isomerase (PGI)                                     | lifespan, fecundity                                           | (Watt, 1983; Watt et al., 1983)                                                                       |
| <i>Conregonus clupeaformis</i>                     | Fish       | <i>Salmo salar</i> zonadhesin-like                                 | fecundity                                                     | (Nolte et al., 2009)                                                                                  |
| <i>Drosophila melanogaster</i>                     | Insect     | Met                                                                | fecundity, timing of initiation of reproduction               | (Flatt and Kawecki, 2004)                                                                             |

|                                                    |            |                                                                                         |                                                         |                                                                          |
|----------------------------------------------------|------------|-----------------------------------------------------------------------------------------|---------------------------------------------------------|--------------------------------------------------------------------------|
| <i>Drosophila melanogaster</i>                     | Insect     | Juvenile hormone (JH), TOR                                                              | lifespan, timing of transition to adulthood             | (Tatar et al., 2001, 2003; Kapahi et al., 2004; Katewa and Kapahi, 2011) |
| <i>Gadus morhua</i>                                | Fish       | Growth hormone 1                                                                        | timing of juvenile maturation                           | (Hemmer-Hansen et al., 2014)                                             |
| <i>Gryllus firmus</i>                              | Insect     | Juvenile hormone (JH)                                                                   | fecundity                                               | (Zera and Huang, 1999; Zhao and Zera, 2002)                              |
| <i>Haliotis refescens</i>                          | Mollusc    | engrailed, aragonite protein 24k Da (ap24)                                              | juvenile mortality                                      | (Zippay et al., 2010)                                                    |
| <i>Heliocidaris erythrogamma</i>                   | Echinoderm | Abopec, Brn1, Brn2, Brn4                                                                | feeding behaviour; timing of initiation of reproduction | (Israel et al., 2016)                                                    |
| <i>Hordeum vulgare</i>                             | Angiosperm | QSD1                                                                                    | seed dormancy                                           | (Sato et al., 2016)                                                      |
| <i>Ichthyomyzon castaneus, I. fossor</i>           | Lamprey    | insulin-like growth factor 1 receptor (igf1r), cytochrome c oxidase subunit III (coIII) | fecundity                                               | (Spice et al., 2014)                                                     |
| <i>Lactuca sativa</i>                              | Angiosperm | DOG1                                                                                    | seed dormancy; timing of initiation of reproduction     | (Huo et al., 2016)                                                       |
| <i>Miletaea cinxia</i>                             | Insect     | phosphoglucose isomerase (PGI)                                                          | lifespan, fecundity                                     | (Klemme and Hanski, 2009; Saastamoinen et al., 2009)                     |
| <i>Miletaea cinxia</i>                             | Insect     | troponin-t (TNT)                                                                        | timing of transition to adulthood                       | (Marden et al., 2008)                                                    |
| <i>Mimulus guttatus</i>                            | Angiosperm | More axillary growth (MAX)                                                              | axillary shoot outgrowth; timing of outgrowth           | (Baker et al., 2012)                                                     |
| <i>Mimulus guttatus; M. nasutus</i>                | Angiosperm | -                                                                                       | timing of reproduction; reproductive allocation         | (Hall et al., 2006)                                                      |
| <i>Oncorhynchus kisutch, O. keta, O. gorbuscha</i> | Fish       | Clock, Cytochrome                                                                       | timing of juvenile maturation                           | (O'Malley et al., 2010)                                                  |
| <i>Oncorhynchus mykiss</i>                         | Fish       | Omy5 loci, including OC6, OC8, OC14, OC20, OC21, and OC30                               | anadromy, timing of smoltification                      | (Nichols et al., 2008; Pearse et al., 2014)                              |
| <i>Oncorhynchus mykiss</i>                         | Fish       | Clock                                                                                   | spawning time                                           | (Leder et al., 2006)                                                     |

|                                                             |            |                                                                                      |                                                                                                   |                                                  |
|-------------------------------------------------------------|------------|--------------------------------------------------------------------------------------|---------------------------------------------------------------------------------------------------|--------------------------------------------------|
| <i>Oncorhynchus mykiss</i>                                  | Fish       | One3ASC, One19ASC                                                                    | biannual spawning                                                                                 | (Colihueque et al., 2010)                        |
| <i>Oncorhynchus mykiss</i> ,<br><i>Oncorhynchus kitsuch</i> | Fish       | 17a,20b-dihydroxy-4-pregnene-3-one                                                   | timing of senescence                                                                              | (Barry et al., 2010)                             |
| <i>Petromyzon marinus</i> ,<br><i>Lampetra appendix</i>     | Lamprey    | Gonadotropin-releasing hormone-I (GnRH-I)<br>and -III (GnRH-III)                     | timing of transition to adulthood                                                                 | (Youson et al., 2006)                            |
| <i>Petunia hybrida</i>                                      | Angiosperm | Decreased apical dominance 1 (DAD1), MAX1,<br>MAX2, CCD7, CCD8                       | axillary shoot outgrowth; timing of<br>and reproductive effort allocated to<br>floral development | (Snowden, 2005; Drummond, 2012)                  |
| <i>Rhagoletis pomonella</i>                                 | Insect     | jetlag (jet), clockwork orange (cwo), PAR-<br>domain protein 1 (Pdp1)                | timing of diapause termination                                                                    | (Ragland et al., 2011)                           |
| <i>Sarcophaga crassipalpis</i>                              | Insect     | heat shock protein 23 (Hsp23), Hsp70, Hsp90,<br>lipid storage protein (LSP)-1, LSP-2 | timing of diapause termination;<br>timing of reproduction; reproductive<br>effort                 | (Rinehart et al., 2000, 2007; Hahn et al., 2008) |
| <i>Thlaspi caerulescens</i>                                 | Angiosperm | Thlc1, Thlc2, Thlc3                                                                  | fecundity, timing of initiation of<br>reproduction                                                | (Jiménez-Ambríz et al., 2007)                    |

Table 3. Genes and QTLs regulating continuously-expressed traits linked to parity.

## 884     **References**

- 886     ACKER, P., A. ROBERT, R. BOURGET, and B. COLAS. 2014. Heterogeneity of reproductive  
age increases the viability of semelparous populations. *Functional Ecology* 28: 458–  
468.
- 888     ÅGREN, J., C.G. OAKLEY, S. LUNDEMO, and D.W. SCHEMSKE. 2016. Adaptive divergence  
in flowering time among natural populations of *Arabidopsis thaliana*: estimates of  
890     selection and QTL mapping. *Evolution* Early Article Proof. 1–15.
- 892     ÅGREN, J., and D.W. SCHEMSKE. 2012. Reciprocal transplants demonstrate strong  
adaptive differentiation of the model organism *Arabidopsis thaliana* in its native  
range. *New Phytologist* 194: 1112–1122.
- 894     AIKAWA, S., M. KOBAYASHI, A. SATAKE, K. SHIMIZU, and H. KUDOH. 2010. Robust  
control of the seasonal expression of the *Arabidopsis FLC* gene in a fluctuating  
896     environment. *Proceedings of the National Academy of Sciences* 107: 11632–11637.
- 898     ALBANI, M.C., L. CASTAINGS, S. WÖTZEL, J.L. MATEOS, J. WUNDER, R. WANG, M.  
REYMOND, and G. COUPLAND. 2012. *PEP1* of *Arabis alpina* Is Encoded by Two  
Overlapping Genes That Contribute to Natural Genetic Variation in Perennial  
900     Flowering. *PLoS Genetics* 8: 1–14.
- 902     ALBANI, M.C., and G. COUPLAND. 2010. Comparative analysis of flowering in annual and  
perennial plants. In M. Timmermans [ed.], *Plant Development*, 323–348. Elsevier  
Inc.
- 904     ALCALA, A.C., and W.C. BROWN. 1967. Population ecology of the tropical seinoïd lizard,  
*Emoia atrocostata*, in the Philippines. *Copeia* 3: 596–604.

- 906 ALDRED, R., M. NIXON, and J. YOUNG. 1983. *Cirrothauma murrayi* Chun, a finned  
octopod. *Philosophical Transactions of the Royal Society of London* 301: 1–54.
- 908 ALONSO- BLANCO, C., S. EL-ASSAL, G. COUPLAND, and M. KOORNNEEF. 1998. Analysis  
of Natural Allelic Variation at Flowering Time Loci in the Landsberg erecta and  
910 Cape Verde Islands Ecotypes of *Arabidopsis thaliana*. *Genetics* 149: 749–764.
- AMASINO, R. 2009. Floral induction and monocarpic versus polycarpic life histories.  
912 *Genome Biology* 10: 228.
- AMASINO, R.M. 1996. Control of flowering time in plants. *Current Opinion in Genetics*  
914 *& Development* 6: 480–487.
- ARIZAGA, S., and E. EZCURRA. 1995. Insurance against reproductive failure in a  
916 semelparous plant: bulbil formation in *Agave macroacantha* flowering stalks.  
*Oecologia* 101: 329–334.
- 918 AUBRY, S., C. LABAUNE, F. MAGNIN, and L. KISS. 2005. Habitat and integration within  
indigenous communities of *Xeropicta derbentina* (Gastropoda: Hygromiidae) a  
920 recently introduced land snail in south-eastern France. *Diversity and Distributions*  
11: 539–547.
- 922 AUSTEN, E.J., J.R.K. FORREST, and A. E. WEIS. 2015. Within-plant variation in  
reproductive investment: consequences for selection on flowering time. *Journal of*  
924 *Evolutionary Biology* 28: 65–79. Available at:  
<http://doi.wiley.com/10.1111/jeb.12538>.
- 926 BAEG, G., Y. SAKURAI, and K. SHIMAZAKI. 1993. Maturation processes in female *Loligo*  
*bleekeri* Keferstein (Mollusca :Cephalopoda). *Veliger* 36: 228–235.

- 928 BAKER, J., D. HEINS, S. FOSTER, and R. KING. 2008. An overview of life history variation  
in threespine stickleback. *Behaviour* 145: 579–602.
- 930 BAKER, J., M. WUND, D. HEINS, R. KING, M. REYES, and S. FOSTER. 2015. Life-history  
plasticity in female threespine stickleback. *Heredity* 115: 322–334.
- 932 BAKER, R.L., L.C. HILEMAN, and P.K. DIGGLE. 2012. Patterns of shoot architecture in  
locally adapted populations are linked to intraspecific differences in gene regulation.  
934 *New Phytologist* 196: 271–281.
- BAKER, W. 1992. Structure, disturbance, and change in the bristlecone pine forests of  
936 Colorado, USA. *Arctic and Alpine Research* 24: 17–26.
- BANTA, J., and M. PURUGGANAN. 2011. The genetics and evolution of flowering time  
938 variation in plants: Identifying genes that control a key life history transition. *In*  
Mechanisms of Life History Evolution: the Genetics and Physiology of Life History  
940 Traits and Trade-offs, 114–126. Oxford University Press, Oxford, UK.
- BARRY, T.P., A. MARWAH, and S. NUNEZ. 2010. Inhibition of cortisol metabolism by 17-  
942 alpha, 20-beta-P: mechanism mediating semelparity in salmon? *General and*  
*Comparative Endocrinology* 165: 53–9.
- 944 BASTOW, R., J.S. MYLNE, C. LISTER, Z. LIPPMAN, R. A MARTIENSSEN, and C. DEAN.  
2004. Vernalization requires epigenetic silencing of *FLC* by histone methylation.  
946 *Nature* 427: 164–167.
- BAUM, B.R., T. EDWARDS, D.A. JOHNSON, and J.P. GUSTAFSON. 2013. What does the 5S  
948 rRNA multigene family tell us about the origin of the annual Triticeae (Poaceae)?  
*Genome* 56: 245–266.

- 950 BELL, G. 1980. The Costs of Reproduction and Their Consequences. *The American Naturalist* 116: 45–76.
- 952 BELL, M., and S. FOSTER. 1994. Introduction to the evolutionary biology of the threespine  
stickleback. In M. Bell, and S. Foster [eds.], *The Evolutionary Biology of the*  
954 *Threespine Stickleback*, 1–27. Oxford University Press, Oxford, UK.
- BENTON, T.G., and A. GRANT. 1999. Optimal Reproductive Effort in Stochastic, Density-  
956 Dependent Environments. *Evolution* 53: 677–688.
- BERGONZI, S., M.C. ALBANI, E. VER LOREN VAN THEMAAT, K.J. V NORDSTRÖM, R.  
958 WANG, K. SCHNEEBERGER, P.D. MOERLAND, and G. COUPLAND. 2013. Mechanisms  
of Age-Dependent Response to Winter Temperature in Perennial Flowering of  
960 *Arabis alpina*. *Science*. 340: 1094–7.
- BIRMETA, G., H. NYBOM, and E. BEKELE. 2004. Distinction between wild and cultivated  
962 enset (*Ensete ventricosum*) gene pools in Ethiopia using RAPD markers. *Hereditas*  
140: 139–148.
- 964 BISANG, I., L. LIENHARD, and A. BERGAMINI. 2008. Fördert die Ökologisierung der  
Landwirtschaft die Hornmoose im Schweizer Mittelland? Swiss Association of  
966 Bryology.
- BISWAS, A.K., and S.K. MANDAL. 1987. Regulation of monocarpic senescence of  
968 *Brassica campestris* by the developing pods. *Physiologia Plantarum* 71: 89–94.
- BLÜMEL, M., N. DALLY, and C. JUNG. 2015. Flowering time regulation in crops-what did  
970 we learn from Arabidopsis? *Current Opinion in Biotechnology* 32: 121–129.
- BOLETZKY, S.V. 1988. A new record of long-continued spawning in *Sepia officinalis*

- 972 (Mollusca, Cephalopoda). *Rapp Comm Int Mer Médit* 31: 257.
- BOLETZKY, S.V. 1987. Fecundity variation in relation to intermittent or chronic spawning
- 974 in the cuttlefish, *Sepia officinalis* L. (Mollusca, Cephalopoda). *Bulletin of Marine Science* 40: 382–387.
- 976 BONNET, X. 2011. The Evolution of Semelparity 17.1. In R. Aldridge, and D. Sever [eds.], *Reproductive Biology and Phylogeny of Snakes*, 645–672. CRC Press, Boca
- 978 Raton, FL, USA.
- BONSER, S.P., and L.W. AARSEN. 2006. Meristem allocation and life-history evolution in
- 980 herbaceous plants. *Canadian Journal of Botany* 84: 143–150.
- BOWERS, J.E. 2000. Does *Ferocactus wislizeni* (Cactaceae) have a between-year seed
- 982 bank? *Journal of Arid Environments* 45: 197–205.
- BRADSHAW, W. 1986. Variable Iteroparity as a Life-History Tactic in the Pitcher-Plant
- 984 Mosquito *Wyeomyia smithii*. *Evolution* 40: 471–478.
- BRENCHLEY, J.L., J. RAVEN, and A.M. JOHNSTON. 1996. A comparison of reproductive
- 986 allocation and reproductive effort between semelparous and iteroparous fucoids (Fucales, Phaetophyta). *Hydrobiologia* 326/327: 185–190.
- 988 BROMMER, J.E., P. KONTIAINEN, and H. PIETIÄINEN. 2012. Selection on plasticity of seasonal life-history traits using random regression mixed model analysis. *Ecology and Evolution* 2: 695–704.
- 990 BRYANT, E. 1971. Life-history consequences of natural selection: Cole’s result. *American Naturalist* 105: 75–76.
- 992 BULMER, M. 1985. Selection for iteroparity in a variable environment. *American*



- 994        *Naturalist* 126: 63–71.
- BULMER, M. 1994. Theoretical Evolutionary Ecology. Sinauer Associates, Boston, USA.
- 996        BUORO, M., and S.M. CARLSON. 2014. Life-history syndromes: Integrating dispersal  
through space and time. *Ecology Letters* 17: 756–767.
- 998        BURD, M., J. READ, G. SANSON, T. JAFFRE, and T. JAFFRÉ. 2006. Age-Size Plasticity for  
Reproduction in Monocarpic Plants. *Ecology* 87: 2755–2764.
- 1000        BURGHARDT, L., J.C. METCALF, A. WILZCEK, J. SCHMITT, and K. DONOHUE. 2015.  
Modeling the influence of genetic and environmental variation on the expression of  
1002        plant life cycles across landscapes. *American Naturalist* 185: 212–227.
- BURGHARDT, L.T., B.R. EDWARDS, and K. DONOHUE. 2016. Multiple paths to similar  
1004        germination behavior in *Arabidopsis thaliana*. *New Phytologist* 209: 1301–1312.
- CAICEDO, A.L., J.R. STINCHCOMBE, K.M. OLSEN, J. SCHMITT, and M.D. PURUGGANAN.  
1006        2004. Epistatic interaction between *Arabidopsis FRI* and *FLC* flowering time genes  
generates a latitudinal cline in a life history trait. *Proceedings of the National*  
1008        *Academy of Sciences of the United States of America* 101: 15670–5.
- CALOW, P. 1979. The cost of reproduction--a physiological approach. *Biological Reviews*  
1010        54: 23–40.
- CASTAINGS, L., S. BERGONZI, M.C. ALBANI, U. KEMI, O. SAVOLAINEN, and G.  
1012        COUPLAND. 2014. Evolutionary conservation of cold-induced antisense RNAs of  
*FLOWERING LOCUS C* in *Arabidopsis thaliana* perennial relatives. *Nature*  
1014        *Communications* 5: 1–9.
- CHANDLER, G.T., and G.M. PLUNKETT. 2004. Evolution in Apiales: nuclear and

- 1016 chloroplast markers together in (almost) perfect harmony. *Botanical Journal of the*  
*Linnean Society* 144: 123–147.
- 1018 CHAPARRO, O.R., A.J. SCHMIDT, L.M. PARDO, P. V. ANDRADE, C.E. WAGNER, and V.M.  
CUBILLOS. 2011. Reproductive strategy of the semelparous clam *Gaimardia*  
1020 *bahamondei* (Bivalvia, Gaimardiidae). *Invertebrate Biology* 130: 49–59.
- CHARNOV, E., and W. SCHAFFER. 1973. Life-History Consequences of Natural Selection:  
1022 Cole’s Result Revisited. *American Naturalist* 107: 791–793.
- CHASE, M., L. HANSON, V. ALBERT, W. WHITTEN, and N. WILLIAMS. 2005. Life history  
1024 evolution and genome size in subtribe Oncidiinae (Orchidaceae). *Annals of Botany*  
95: 191–199.
- 1026 CHIANG, G.C.K., M. BARTSCH, D. BARUA, K. NAKABAYASHI, M. DEBIEU, I. KRONHOLM,  
M. KOORNNEEF, ET AL. 2011. DOG1 expression is predicted by the seed-maturation  
1028 environment and contributes to geographical variation in germination in *Arabidopsis*  
*thaliana*. *Molecular Ecology* 20: 3336–3349.
- 1030 CHIANG, G.C.K., D. BARUA, E. DITTMAR, E.M. KRAMER, R.R. DE CASAS, and K.  
DONOHUE. 2013. Pleiotropy in the wild: The dormancy gene *dog1* exerts cascading  
1032 control on life cycles. *Evolution* 67: 883–893.
- CHIANG, G.C.K., D. BARUA, E.M. KRAMER, R.M. AMASINO, and K. DONOHUE. 2009.  
1034 Major flowering time gene, *flowering locus C*, regulates seed germination in  
*Arabidopsis thaliana*. *Proceedings of the National Academy of Sciences of the*  
1036 *United States of America* 106: 11661–11666.
- CHRISTIANSEN, J.S., K. PRÆBEL, S.I. SIIKAVUOPIO, and J.E. CARSCADDEN. 2008.

- 1038 Facultative semelparity in capelin *Mallotus villosus* (Osmeridae)-an experimental  
test of a life history phenomenon in a sub-arctic fish. *Journal of Experimental*  
1040 *Marine Biology and Ecology* 360: 47–55.
- CLARK, C., and M. MANGEL. 2000. Dynamic State Variable Models in Ecology: Methods  
1042 and Applications. Oxford University Press, Oxford, UK.
- COHEN, D. 1966. Optimizing reproduction in a randomly varying environment. *Journal of*  
1044 *Theoretical Biology* 12: 119–129.
- COLE, L. 1954. The Population Consequences of Life History Phenomena. *The Quarterly*  
1046 *Review of Biology* 29: 103–137.
- COLIHUEQUE, N., R. C??RDENAS, L. RAM??REZ, F. ESTAY, and C. ARANEDA. 2010.  
1048 Analysis of the association between spawning time QTL markers and the biannual  
spawning behavior in rainbow trout (*Oncorhynchus mykiss*). *Genetics and*  
1050 *Molecular Biology* 33: 578–582.
- COOKE, S., S. HINCH, A. FARRELL, M. LAPOINTE, S. JONES, J. MACDONALD, D.  
1052 PATTERSON, ET AL. 2004. Abnormal migration timing and high en route mortality of  
sockeye salmon in the Fraser River, British Columbia. *Fisheries* 29: 22–33.
- 1054 CORKUM, L., J. CIBOROWSKI, and R. POULIN. 1997. Effects of emergence date and  
maternal size on egg development and sizes of eggs and first-instar nymphs of a  
1056 semelparous aquatic insect. *Oecologia* 111: 69–75.
- LE CORRE, V., F. ROUX, and X. REBOUD. 2002. DNA polymorphism at the *FRIGIDA*  
1058 gene in *Arabidopsis thaliana*: extensive nonsynonymous variation is consistent with  
local selection for flowering time. *Molecular Biology and Evolution* 19: 1261–71.

- 1060 COSTANTINI, L., J. BATTILANA, F. LAMAJ, G. FANIZZA, and M.S. GRANDO. 2008. Berry  
and phenology-related traits in grapevine (*Vitis vinifera* L.): from quantitative trait  
1062 loci to underlying genes. *BMC Plant Biology* 8: 1–17.
- COUPLAND, G. 1995. Genetic and environmental control of flowering time in  
1064 *Arabidopsis*. *Trends in Genetics* 11: 393–397.
- CRESPI, B., and R. TEO. 2002. Comparative phylogenetic analysis of the evolution of  
1066 semelparity and life history in salmonid fishes. *Evolution* 56: 1008–1020.
- CUSHING, J.M. 2015. On the Fundamental Bifurcation Theorem for Semelparous Leslie  
1068 Models. *In Dynamics, Games, and Science*, 215–251. Springer International  
Publishing, New York, USA.
- 1070 CUSHING, J.M. 2009. Three stage semelparous Leslie models. *Journal of Mathematical  
Biology* 59: 75–104.
- 1072 CUSHING, J.M., and S.M. HENSON. 2012. Stable bifurcations in semelparous Leslie  
models. *Journal of Biological Dynamics* 6: 80–102.
- 1074 CUSHING, J.M., and S.M. STUMP. 2013. Darwinian Dynamics of a Juvenile-Adult Model.  
*Mathematical Biosciences and Engineering* 10: 1017–1044.
- 1076 DA-SILVA, C., E. MARTINS, V. BONATO, and S. DOS REIS. 2008. Bayesian capture-  
recapture analysis: An application in modeling semelparity of a neotropical  
1078 didelphid marsupial. *Communications in Statistics-Simulation and Computation* 37:  
816–828.
- 1080 DANON, A., V. DELORME, N. MAILHAC, and P. GALLOIS. 2000. Plant programmed cell  
death: A common way to die. *Plant Physiology and Biochemistry* 38: 647–655.

- 1082 DAVIES, R.W., and E. DRATNAL. 1996. Differences in energy allocaton during growth and  
reproduction by semelparous and iteroparous *Nephelopsis obscura* (Erpobdellidae).  
1084 *Archiv für Hydrobiologie* 138: 45–55.
- DAVISON, R., and W. SATTERTHWAITE. 2016. Use of Age- and Stage-structured Matrix  
1086 Models to Predict Life History Schedules for Semelparous Populations. *Natural  
Resource Modeling* 29: 538–558.
- 1088 DAVYDOVA, N.V., O. DIEKMANN, and S. A. VAN GILS. 2005. On circulant populations. I.  
The algebra of semelparity. *Linear Algebra and its Applications* 398: 185–243.
- 1090 DENEKAMP, N.Y., R. REINHARDT, M.W. ALBRECHT, M. DRUNGOWSKI, M. KUBE, and E.  
LUBZENS. 2011. The expression pattern of dormancy-associated genes in multiple  
1092 life-history stages in the rotifer *Brachionus plicatilis*. *Hydrobiologia* 662: 51–63.
- DENG, W., H. YING, C.A. HELLIWELL, J.M. TAYLOR, W.J. PEACOCK, and E.S. DENNIS.  
1094 2011. FLOWERING LOCUS C (FLC) regulates development pathways throughout  
the life cycle of Arabidopsis. *Proceedings of the National Academy of Sciences* 108:  
1096 6680–6685.
- DICKHOFF, W.W. 1989. Salmonids and annual fishes: death after sex. *In* Development,  
1098 maturation, and senescence of neuroendocrine systems: a comparative approach,  
253–266. Academic Press, New York, USA.
- 1100 DIGGLE, P.K. 1995. Architectural effects and the interpretation of patterns of fruit and  
seed development. *Annual Review of Ecology and Systematics* 26: 531–552.
- 1102 DIGGLE, P.K. 1997. Ontogenetic contingency and floral morphology: the effects of  
architecture and resource limitation. *International Journal of Plant Sciences* 158:

- 1104 S99–S107.
- DITTMAR, E.L., C.G. OAKLEY, J. ÅGREN, and D.W. SCHEMSKE. 2014. Flowering time
- 1106 QTL in natural populations of *Arabidopsis thaliana* and implications for their  
adaptive value. *Molecular Ecology* 23: 4291–4303.
- 1108 DONOHUE, K., L.T. BURGHARDT, D. RUNCIE, K.J. BRADFORD, and J. SCHMITT. 2014.  
Applying developmental threshold models to evolutionary ecology. *Trends in*
- 1110 *Ecology & Evolution* 30: 66–77.
- DOUGHTY, P., and R. SHINE. 1997. Detecting life history trade-offs: Measuring energy
- 1112 stores in “capital” breeders reveals costs of reproduction. *Oecologia* 110: 508–513.
- DROUINEAU, H., C. RIGAUD, F. DAVERAT, and P. LAMBERT. 2014. EvEel (evolutionary
- 1114 ecology-based model for eel): a model to explore the role of phenotypic plasticity as  
an adaptive response of three temperate eels to spatially structured environments.
- 1116 *Canadian Journal of Fisheries and Aquatic Sciences* 71: 1561–1571.
- DRUFFEL, E., S. GRIFFIN, A. WITTER, E. NELSON, J. SOUTHON, M. KASHGARIAN, and J.
- 1118 VOGEL. 1995. Gerardia - Bristlecone Pine of the Deep Sea. *Geochimica et*  
*Cosmochimica Acta* 59: 5031–5036.
- 1120 DRUMMOND, R. 2012. The expression of petunia strigolactone pathway genes is altered as  
part of the endogenous developmental program. *Frontiers in Plant Science* 2: 1–14.
- 1122 EDMUNDS, G.F., S.L. JENSEN, and L. BERNER. 1976. The mayflies of north and central  
America. University of Minnesota Press, Minneapolis.
- 1124 EINUM, S., and I. FLEMING. 2007. Of chickens and eggs: diverging propagule size of  
iteroparous and semelparous organisms. *Evolution* 61: 232–238.

- 1126 ELBADRY, E., and M. TAWFIK. 1966. Life cycle of the mite *Adactylidium* sp. (Acarina:  
Pyemotidae), a predator of thrips eggs in the United Arab Republic. *Annals of the*  
1128 *Entomological Society* 59: 458–461.
- ELLNER, S., and M. REES. 2006. Integral projection models for species with complex  
1130 demography. *American Naturalist* 167: 410–428.
- EMLEN, J. 1970. Age specificty and ecological theory. *Ecology* 51: 588–601.
- 1132 EULGEM, T., P.J. RUSHTON, S. ROBATZEK, and I.E. SOMSSICH. 2000. The WRKY  
superfamily of plant transcription factors. *Trends in Plant Science* 5: 199–206.
- 1134 EVANS, M., D.D. HEARN, W.W. HAHN, J. SPANGLE, D. VENABLE, and L. VENABLE. 2005.  
Climate and life-history evolution in evening primroses (Oenothera, Onagraceae): a  
1136 phylogenetic comparative analysis. *Evolution* 59: 1914–1927.
- FADEN, R.B. 2006. Commelina. In F. of N. A. E. Committee [ed.], Flora of North  
1138 America, 22. Oxford University Press, New York, USA.
- FADEN, R.B. 1993. The misconstrued and rare species of Commelina (Commelinaceae) in  
1140 the eastern United States. *Annals of the Missouri Botanical Garden* 80: 208–218.
- FINCH, C. 1998. Variations in senescence and longevity include the possibility of  
1142 negligible senescence. *Journals of Gerontology Series A - Biological Sciences and*  
*Medical Sciences* 53: 235–239.
- 1144 FINCH, C.E., and M.R. ROSE. 1995. Hormones and the Physiological Architecture of Life  
History Evolution. *The Quarterly Review of Biology* 70: 1–52.
- 1146 FINK, L.S. 1986. Costs and benefits of maternal behaviour in the green lynx spider  
(Oxyopidae, *Peucetia viridans*). *Animal Behaviour* 34: 1051–1060.

- 1148 FISHER, D.O., and S.P. BLOMBERG. 2011. Costs of reproduction and terminal investment  
by females in a semelparous marsupial. *PloS one* 6: e15226.
- 1150 FLATT, T., and T.J. KAWECKI. 2004. Pleiotropic effects of methoprene-tolerant (Met), a  
gene involved in juvenile hormone metabolism, on life history traits in *Drosophila*  
1152 *melanogaster*. *Genetica* 122: 141–160.
- FLEMING, I. 1998. Pattern and variability in the breeding system of Atlantic salmon, with  
1154 comparisons to other salmonids. *Canadian Journal of Fisheries and Aquatic*  
*Sciences* 55: 59–76.
- 1156 FOSTER, R. 1977. *Tachigalia versicolor* is a suicidal neotropical tree. *Nature* 268: 624–  
626.
- 1158 FOWLER, S., K. LEE, H. ONOUCHI, A. SAMACH, K. RICHARDSON, B. MORRIS, G.  
COUPLAND, ET AL. 1999. *GIGANTEA*: a circadian clock-controlled gene that  
1160 regulates photoperiodic flowering in Arabidopsis and encodes a protein with several  
possible membrane-spanning domains. *The EMBO Journal* 18: 4679–4688.
- 1162 FRANKLIN, D., and N. HOGARTH. 2008. Flowering and flooding: Factors influencing  
shoot production in a semelparous bamboo. *Journal of Tropical Forest Science* 20:  
1164 188–192.
- FRANKLIN, D.C. 2004. Synchrony and asynchrony: observations and hypotheses for the  
1166 flowering wave in a long-lived semelparous bamboo. *Journal of Biogeography* 31:  
773–786.
- 1168 FRITZ, R., N. STAMP, and T. HALVERSON. 1982. Iteroparity and semelparity in insects.  
*American Naturalist* 120: 264–268.



- 1170 FUKUDA, S. 1953. Determination of voltinism in the univoltine silkworm. *Proceedings of the Japan Academy* 29: 381–384.
- 1172 FURUTA, T., and T. ITO. 1999. Life Cycle and Environmentally Induced Semelparity in the Shore Isopod *Ligia cinerascens* (Ligiidae) on a Cobble Shore along Tokyo Bay, Central Japan. *Journal of Crustacean Biology* 19: 752–761.
- 1174 FUTAMI, K., and S.I. AKIMOTO. 2005. Facultative second oviposition as an adaptation to egg loss in a semelparous crab spider. *Ethology* 111: 1126–1138.
- 1176 GADGIL, M., and W.H. BOSSERT. 1970. Life historical consequences of natural selection. *American Naturalist* 104: 1–24.
- 1178 GAGNON, P., and W. PLATT. 2008. Reproductive and seedling ecology of a semelparous native bamboo (*Arundinaria gigantea*, Poaceae). *The Journal of the Torrey Botanical Society* 135: 309–316.
- 1180 GARCÍA, M.B. 2003. Sex Allocation in a Long-Lived Monocarpic Plant. *Plant Biology* 5: 203–209.
- 1182 GARCIA DE LEANIZ, C., I.A. FLEMING, S. EINUM, E. VERSPOOR, W.C. JORDAN, S. CONSUEGRA, N. AUBIN-HORTH, ET AL. 2007. A critical review of adaptive genetic variation in Atlantic salmon: Implications for conservation. *Biological Reviews* 82: 173–211.
- 1186 GAZZANI, S., A.R. GENDALL, C. LISTER, and C. DEAN. 2003. Analysis of the Molecular Basis of Flowering Time Variation in Arabidopsis Accessions. *Plant Physiology* 132: 1107–1114.
- 1190 GERTSCH, W. 1939. A revision of the typical crab-spiders (Misumeninae) of America

- 1192 north of Mexico. *Bulletin of the American Museum of Natural History* 76: 277–442.
- GHORAI, R., N. CHAUDHURI, and S. SENAPATI. 2009. Impact of food plant and weather
- 1194 parameters on longevity of female muga silkworm *Antheraea assama* Westwood.
- Indian Journal of Agricultural Research* 43: 303–306.
- 1196 GOLDING, D.W., and E. YUWONO. 1994. Latent capacities for gametogenic cycling in the
- semelparous invertebrate *Nereis*. *Proceedings of the National Academy of Sciences*
- 1198 *of the United States of America* 91: 11777–11781.
- GOLDRAZENA, A., R. JORDANA, and Z. ZHANG. 1997. *Adactylidium moundi* and A.
- 1200 *costarricensis*, two new species of Acarophenacidae (Acari: Tarsonemida) parasitic
- on Thysanoptera. *International Journal of Acarology* 23: 261–268.
- 1202 GONZALEZ, A. 1994. Bioecologia de *Illex coindetii* (Verany, 1839) (Cephalopoda,
- Ommastrephidae) de las aguas de Galicia. University of Vigo.
- 1204 GONZALEZ, A., and A. GUERRA. 1996. Reproductive biology of the short-finned squid
- Illex coindetii* (Cephalopoda: Ommastrephidae) of the northeastern Atlantic. *Sarsia*
- 1206 81: 107–118.
- GREMER, J.R., and D.L. VENABLE. 2014. Bet hedging in desert winter annual plants:
- 1208 Optimal germination strategies in a variable environment. *Ecology Letters* 17: 380–
- 7.
- 1210 GRINSTED, L., C.J. BREUKER, and T. BILDE. 2014. Cooperative breeding favors maternal
- investment in size over number of eggs in spiders. *Evolution* 68: 1961–73.
- 1212 GROSBERG, R. 1988. Life-history variation within a population of the colonial ascidian
- Botryllus schlosseri*. I. The genetic and environmental control of seasonal variation.

- 1214        *Evolution* 42: 900–920.
- 1216        HAGGARD, K., and B. TIFFNEY. 1997. The flora of the early Miocene Brandon Lignite,  
Vermont, USA. VIII. *Caldesia* (Alismataceae). *American Journal of Botany* 84:  
239–252.
- 1218        HAHN, D.A., L.N. JAMES, K.R. MILNE, and J.D. HATLE. 2008. Life-history plasticity after  
attaining a dietary threshold for reproduction is associated with protein storage in  
1220        flesh flies. *Functional Ecology* 22: 1081–1090.
- 1222        HALL, D., V. LUQUEZ, V.M. GARCIA, K.R. ST ONGE, S. JANSSON, and P.K. INGVARSSON.  
2007. Adaptive population differentiation in phenology across a latitudinal gradient  
in European aspen (*Populus tremula*, L.): A comparison of neutral markers,  
1224        candidate genes and phenotypic traits. *Evolution* 61: 2849–2860.
- 1226        HALL, M.C., C.J. BASTEN, and J.H. WILLIS. 2006. Pleiotropic quantitative trait loci  
contribute to population divergence in traits associated with life-history variation in  
*Mimulus guttatus*. *Genetics* 172: 1829–1844.
- 1228        HARVELL, C., and R. GROSBERG. 1988. The Timing of Sexual Maturity in Clonal  
Animals. *Ecology* 69: 1855–1864.
- 1230        HASTON, E., J.E. RICHARDSON, P.F. STEVENS, M.W. CHASE, and D.J. HARRIS. 2009. The  
Linear Angiosperm Phylogeny Group (LAPG) III: a linear sequence of the families  
1232        in APG III. *Botanical Journal of the Linnean Society* 161: 128–131.
- 1234        HAUTEKÈETE, N., H. VAN DIJK, Y. PIQUOT, and A. TERIOKHIN. 2009. Evolutionary  
optimization of life-history traits in the sea beet *Beta vulgaris* subsp. *maritima*:  
Comparing model to data. *Acta Oecologica* 35: 104–116.

- 1236 HAUTEKÈETE, N., Y. PIQUOT, and H. VAN DIJK. 2001. Investment in survival and  
reproduction along a semelparity-iteroparity gradient in the Beta species complex.  
1238 *Journal of Evolutionary Biology* 14: 795–804.
- HAUTEKÈETE, N., Y. PIQUOT, and H. VAN DIJK. 2002. Life span in *Beta vulgaris* spp.  
1240 *maritima*: the effects of age at first reproduction and disturbance. *Journal of Ecology*  
90: 508–516.
- 1242 HEMMER-HANSEN, J., N.O. THERKILDSEN, D. MELDRUP, and E.E. NIELSEN. 2014.  
Conserving marine biodiversity: insights from life-history trait candidate genes in  
1244 Atlantic cod (*Gadus morhua*). *Conservation Genetics* 15: 213–228.
- HENDRY, A.P., Y.E. MORBEY, O.K. BERG, and J.K. WENBURG. 2004. Adaptive variation  
1246 in senescence: reproductive lifespan in a wild salmon population. *Proceedings of the*  
*Royal Society B*. 271: 259–66.
- 1248 HENNING-LUCASS, N., M. CORDELLIER, B. STREIT, and K. SCHWENK. 2016. Phenotypic  
plasticity in life-history traits of *Daphnia galeata* in response to temperature - a  
1250 comparison across clonal lineages separated in time. *Ecology and Evolution* 6: 881–  
891.
- 1252 HOP, H., and G. H. 2013. Polar cod (*Boreogadus saida*) and capelin (*Mallotus villosus*) as  
key species in marine food webs of the Arctic and Barents Sea. *Marine Biology*  
1254 *Research* 9: 878–894.
- HOP, H., V. TRUDEAU, and M. GRAHAM. 1995. Spawning energetics of Arctic cod  
1256 (*Boreogadus saida*) in the northwest Atlantic during 1959-1978. *Canadian Journal*  
*of Fisheries and Aquatic Sciences* 52: 541–550.

- 1258 HOVING, H.-J.T., W.F. GILLY, U. MARKAIDA, K.J. BENOIT-BIRD, Z.W. -BROWN, P.  
DANIEL, J.C. FIELD, ET AL. 2013. Extreme plasticity in life-history strategy allows a  
1260 migratory predator (jumbo squid) to cope with a changing climate. *Global Change  
Biology* 19: 2089–2103.
- 1262 HUGHES, P.W., and A.M. SIMONS. 2014a. Changing reproductive effort within a  
semelparous reproductive episode. *American Journal of Botany* 101: 1323–31.
- 1264 HUGHES, P.W., and A.M. SIMONS. 2015. Microsatellite evidence for obligate autogamy,  
but abundant genetic variation in the herbaceous monocarp *Lobelia inflata*  
1266 (Campanulaceae). *Journal of Evolutionary Biology* 28: 2068–2077.
- HUGHES, P.W., and A.M. SIMONS. 2014b. Secondary reproduction in the herbaceous  
1268 monocarp *Lobelia inflata*: Time-constrained primary reproduction does not result in  
increased deferral of reproductive effort. *BMC Ecology* 14: 1–10.
- 1270 HUGHES, P.W., and A.M. SIMONS. 2014c. The continuum between semelparity and  
iteroparity: plastic expression of parity in response to season length manipulation in  
1272 *Lobelia inflata*. *BMC Evolutionary Biology* 14: 90.
- HUO, H., S. WEI, and K.J. BRADFORD. 2016. DELAY OF GERMINATION1 (DOG1)  
1274 regulates both seed dormancy and flowering time through microRNA pathways.  
*Proceedings of the National Academy of Sciences* 113: 1–8.
- 1276 HUXMAN, T.E., and M.E. LOIK. 1997. Reproductive patterns of two varieties of *Yucca  
whipplei* (Liliaceae) with different life histories. *International Journal of Plant  
1278 Sciences* 158: 778–784.
- IGUCHI, K. 1996. Size-specific spawning pattern in ayu, *Plecoglossus altivelis*.

- 1280 *Ichthyological Research* 43: 193–198.
- IGUCHI, K., and Y. TSUKAMOTO. 2001. Semelparity or iteroparity: resource allocation
- 1282 tactics in the ayu, an osmenid fish. *Journal of Fish Biology* 58: 520–528.
- IKEDA, D., Y. SAKURAI, and K. SHIMIZAKI. 1993. Maturation process of the Japanese
- 1284 common squid *Todarodes pacificus* in captivity. In T. Okutani, R. O’Dor, and T.
- Kubodera [eds.], *Recent Advances in Cephalopod Fisheries Biology*, 179–187.
- 1286 Tokai University Press, Tokyo, Japan.
- IMAIZUMI, T., and S. KAY. 2006. Photoperiodic control of flowering: not only by
- 1288 coincidence. *Trends in Plant Science* 11: 550–8.
- ISRAEL, J.W., M.L. MARTIK, M. BYRNE, E.C. RAFF, R.A. RAFF, D.R. MCCLAY, and G.A.
- 1290 WRAY. 2016. Comparative Developmental Transcriptomics Reveals Rewiring of a
- Highly Conserved Gene Regulatory Network during a Major Life History Switch in
- 1292 the Sea Urchin Genus *Heliocidaris*. *PLOS Biology* 14: e1002391.
- IWASA, Y. 1991. Pessimistic plant: optimal growth schedule in stochastic environments.
- 1294 *Theoretical Population Biology* 40: 246–268.
- JABAILY, R., and K. SYTSMA. 2013. Historical biogeography and life-history evolution of
- 1296 Andean Puya (Bromeliaceae ). *Botanical Journal of the Linnean Society* 173: 201–
- 224.
- 1298 JAVOIŠ, J. 2013. A two-resource model of terminal investment. *Theory in Biosciences*
- 132: 123–132.
- 1300 JIMÉNEZ-AMBRIZ, G., C. PETIT, I. BOURRIÉ, S. DUBOIS, I. OLIVIERI, and O. RONCE. 2007.
- Life history variation in the heavy metal tolerant plant *Thlaspi caerulescens* growing

- 1302 in a network of contaminated and noncontaminated sites in southern France: Role of  
gene flow, selection and phenotypic plasticity. *New Phytologist* 173: 199–215.
- 1304 JOHANSON, U., J. WEST, C. LISTER, S. MICHAELS, R. AMASINO, and C. DEAN. 2000.  
Molecular analysis of *FRIGIDA*, a major determinant of natural variation in  
1306 *Arabidopsis* flowering time. *Science* 290: 344–7.
- JUNG, J.-H., Y.-H. SEO, P.J. SEO, J.L. REYES, J. YUN, N.-H. CHUA, and C.-M. PARK. 2007.
- 1308 The *GIGANTEA*-Regulated *MicroRNA172* Mediates Photoperiodic Flowering  
Independent of *CONSTANS* in *Arabidopsis*. *The Plant Cell* 19: 2736–2748.
- 1310 KAITALA, V., D. TESAR, and E. RANTA. 2002. Semelparity versus iteroparity and the  
number of age groups. *Evolutionary Ecology Research* 4: 169–179.
- 1312 KAPAH, P., B. ZID, T. HARPER, D. KOSLOVER, V. SAPIN, and S. BENZER. 2004.  
Regulation of Lifespan in *Drosophila* by Modulation of Genes in the *TOR* Signaling  
1314 Pathway. *Current Biology* 14: 885–890.
- KARDAILSKY, I. 1999. Activation Tagging of the Floral Inducer *FT*. *Science* 286: 1962–  
1316 1965.
- KATEWA, S.D., and P. KAPAH. 2011. Role of *TOR* signaling in aging and related  
1318 biological processes in *Drosophila melanogaster*. *Experimental Gerontology* 46:  
382–390.
- 1320 KEELER, K.H. 1987. Survivorship and Fecundity of the Polycarpic Perennial *Mentzelia*  
*nuda* (Loasaceae) in Nebraska Sandhills Prairie. *American Journal of Botany* 74:  
1322 785.
- KEELEY, J., and W. BOND. 1999. Mast Flowering and Semelparity in Bamboos: The

- 1324 Bamboo Fire Cycle Hypothesis. *The American Naturalist* 154: 383–391.
- KEELEY, J.E., S.C. KEELEY, and D.A. IKEDA. 1986. Seed Predation by *Yucca* Moths on
- 1326 Semelparous, Iteroparous and Vegetatively Reproducing Subspecies of *Yucca*  
*Whipplei* (Agavaceae). *American Midland Naturalist* 115: 1–9.
- 1328 KEMI, U., A. NIITTYVUOPIO, T. TOIVAINEN, A. PASANEN, B. QUILOT-TURION, K. HOLM, U.  
LAGERCRANTZ, ET AL. 2013. Role of vernalization and of duplicated *FLOWERING*
- 1330 *LOCUS C* in the perennial *Arabidopsis lyrata*. *New Phytologist* 197: 323–335.
- KENYON, C. 2011. The first long-lived mutants: discovery of the insulin/*IGF-1* pathway
- 1332 for ageing. *Philosophical Transactions of the Royal Society of London. Series B,*  
*Biological Sciences* 366: 9–16.
- 1334 KEW WORLD CHECKLIST (VARIOUS AUTHORS). 2017. “World Checklist of Selected Plant  
Families.” *Royal Botanic Gardens, Kew*.
- 1336 KIM, C.-H., and E.J. MUTURI. 2012. Relationship between leaf litter identity, expression  
of cytochrome P450 genes and life history traits of *Aedes aegypti* and *Aedes*
- 1338 *albopictus*. *Acta Tropica* 122: 94–100.
- KIM, E., and K. DONOHUE. 2011. Demographic, developmental and life-history variation
- 1340 across altitude in *Erysimum capitatum*. *Journal of Ecology* 99: 1237–1249.
- KIM, S.-Y., B.-S. PARK, S.-J. KWON, J. KIM, M.-H. LIM, Y.-D. PARK, D.Y. KIM, ET AL.
- 1342 2007. Delayed flowering time in *Arabidopsis* and *Brassica rapa* by the  
overexpression of *FLOWERING LOCUS C (FLC)* homologs isolated from Chinese
- 1344 cabbage (*Brassica rapa* L. ssp. *pekinensis*). *Plant Cell Reports* 26: 327–336.
- KINDSVATER, H.K., D.C. BRAUN, S.P. OTTO, and J.D. REYNOLDS. 2016. Costs of



- 1346 reproduction can explain the correlated evolution of semelparity and egg size: theory  
and a test with salmon. *Ecology Letters* 19: 687–696.
- 1348 KIRCHOFF, B.K. 1992. Ovary structure and anatomy in the Heliconiaceae and Musaceae  
(Zingiberales). *Canadian Journal of Botany* 70: 2490–2508.
- 1350 KIRKENDALL, L.R., and N.C. STENSETH. 1985. On Defining “Breeding Once.” *American  
Naturalist* 125: 189–204.
- 1352 KISS, L., G. LABAUNE, F. MAGNIN, and S. AUBRY. 2005. Plasticity of the life history of  
*Xeropicta derbentina* (Krynicky, 1836), a recently introduced snail in Mediterranean  
1354 France. *Journal of Molluscan Studies* 71: 221–231.
- KITAJIMA, K., and C. AUGSPURGER. 1989. Seed and seedling ecology of a monocarpic  
1356 tropical tree, *Tachigalia versicolor*. *Ecology* 70: 1102–1114.
- KLEMM, I., and I. HANSKI. 2009. Heritability of and strong single gene (*Pgi*) effects on  
1358 life-history traits in the Glanville fritillary butterfly. *Journal of Evolutionary Biology*  
22: 1944–1953.
- 1360 VAN KLEUNEN, M. 2007. Adaptive genetic differentiation in life-history traits between  
populations of *Mimulus guttatus* with annual and perennial life-cycles. *Evolutionary  
1362 Ecology* 21: 185–199.
- KOORNNEEF, M., C. ALONSO- BLANCO, A. PEETERS, and W. SOPPE. 1998. Genetic  
1364 control of flowering time in Arabidopsis: the late-flowering mutant gigantea is  
tolerant to paraquat. *Annual Review of Plant Physiology and Plant Molecular  
1366 Biology* 49: 345–370.
- KOTAKE, T., S. TAKADA, K. NAKAHIGASHI, M. OHTO, and K. GOTO. 2003. Arabidopsis

- 1368      *Terminal Flower 2* gene encodes a heterochromatin protein 1 homolog and represses  
both *FLOWERING LOCUS T* to regulate flowering time and several floral homeotic  
1370      genes. *Plant and Cell Physiology* 44: 555–564.
- KOZŁOWSKI, J. 1992. Optimal allocation of resources to growth and reproduction:  
1372      Implications for age and size at maturity. *Trends in Ecology & Evolution* 7: 15–9.
- KOZŁOWSKI, J., and R.G. WIEGERT. 1986. Optimal allocation of energy to growth and  
1374      reproduction. *Theoretical Population Biology* 29: 16–37.
- KRAAIJEVELD, K., F.J.L. KRAAIJEVELD-SMIT, and G.J. ADCOCK. 2003. Does female  
1376      mortality drive male semelparity in dasyurid marsupials? *Proceedings of the Royal  
Society B*. 270 Suppl: S251–3.
- 1378      KUSS, P., M. REES, H. AEGISDOTTIR, S. ELLNER, and J. STOCKLIN. 2008. Evolutionary  
demography of long-lived monocarpic perennials: a time-lagged integral projection  
1380      model. *Journal of Ecology* 96: 821–832.
- LACEY, E.P. 1988. Latitudinal Variation in Reproductive Timing of a Short-Lived  
1382      Monocarp , *Daucus carota* (Apiceae). *Ecology* 69: 220–232.
- LAMARQUE, L.J., C.J. LORTIE, A.J. PORTÉ, and S. DELZON. 2015. Genetic differentiation  
1384      and phenotypic plasticity in life-history traits between native and introduced  
populations of invasive maple trees. *Biological Invasions* 17: 1109–1122.
- 1386      LAPTIKHOVSKY, V. 1998. Differentiation of reproductive strategies within a taxon, as  
exemplified by octopods. *Ruthenica* 8: 77–80.
- 1388      LAPTIKHOVSKY, V. 1999. Fecundity and reproductive strategy of three species of  
octopods from the northwest Bering Sea. *Russian Journal of Marine Biology* 25:

- 1390 342–346.
- LAROCHE, J., and J. BOUSQUET. 1999. Evolution of the mitochondrial *rps3* intron in  
1392 perennial and annual angiosperms and homology to *nad5* intron 1. *Molecular  
Biology and Evolution* 16: 441–52.
- 1394 LAZARIDOU, M., and M. CHATZIOANNOU. 2005. Differences in the life histories of  
*Xerolenta obvia* (Menke, 1828) (Hygromodae) in a coastal and a mountainous area  
1396 of northern Greece. *Journal of Molluscan Studies* 71: 247–252.
- LEDER, E.H., R.G. DANZMANN, and M.M. FERGUSON. 2006. The candidate gene, *Clock*,  
1398 localizes to a strong spawning time quantitative trait locus region in rainbow trout.  
*The Journal of Heredity* 97: 74–80.
- 1400 LEDGER, S.E., B.J. JANSSEN, S. KARUNAIRETNAM, T. WANG, and K.C. SNOWDEN. 2010.  
Modified *CAROTENOID CLEAVAGE DIOXYGENASE-8* expression correlates with  
1402 altered branching in kiwifruit (*Actinidia chinensis*). *New Phytologist* 188: 803–813.
- LEGGETT, W.C., and J.E. CARSCADDEN. 1978. Latitudinal Variation in Reproductive  
1404 Characteristics of American Shad (*Alosa sapidissima*): Evidence for Population  
Specific Life History Strategies in Fish. *Journal of the Fisheries Research Board of  
1406 Canada* 35: 1469–1478.
- LEINER, N., E. SETZ, and W. SILVA. 2008. Semelparity and factors affecting the  
1408 reproductive activity of the Brazilian slender opossum (*Marmosops paulensis*) in  
Southeastern Brazil. *Journal of Mammalogy* 89: 153–158.
- 1410 LEINONEN, P.H., D.L. REMINGTON, J. LEPPÄLÄ, and O. SAVOLAINEN. 2013. Genetic basis  
of local adaptation and flowering time variation in *Arabidopsis lyrata*. *Molecular*

- 1412 *Ecology* 22: 709–723.
- LESICA, P., and J. SHELLY. 1995. Effects of reproductive mode on demography and life
- 1414 history in *Arabis fecunda* (Brassicaceae). *American Journal of Botany* 82: 752–762.
- LESICA, P., and T.P. YOUNG. 2005. A demographic model explains life-history variation
- 1416 in *Arabis fecunda*. *Functional Ecology* 19: 471–477.
- LESSELLS, C.M. 2005. Why are males bad for females? Models for the evolution of
- 1418 damaging male mating behavior. *American Naturalist* 165 Suppl: S46-63.
- LETSCHERT, J. 1993. Beta section Beta: biogeographical patterns of variation and
- 1420 taxonomy. *Wageningen Agricultural University Papers* 93: 1–155.
- LEWIS, A., and J. CHOAT. 1993. Spawning mode and reproductive output of the tropical
- 1422 cephalopod *Idiosepius pygmaeus*. *Canadian Journal of Fisheries and Aquatic Sciences* 50: 20–28.
- 1424 LINNAEUS, C. 1744. Oratio de telluris habitabilis incremento. Cornelium Haak, Leyden.
- LIU, Y., Y. LI, X. LI, and L. QIN. 2010. The Origin and Dispersal of the Domesticated
- 1426 Chinese Oak Silkworm, *Antheraea pernyi*, in China: a Reconstruction Based on Ancient Texts. *Journal of Insect Science* 10: 1–10.
- 1428 LOÏC, B., H. MIKKO, G. HARALD, L. BAULIER, M. HEINO, and H. GJØSÆTER. 2012.
- Temporal stability of the maturation schedule of capelin *Mallotus villosus* in the
- 1430 Barents Sea. *Aquatic Living Resources* 161: 151–161.
- LOPES, G.P., and N.O. LEINER. 2015. Semelparity in a population of *Gracilinanus agilis*
- 1432 (Didelphimorphia: Didelphidae) inhabiting the Brazilian cerrado. *Mammalian Biology - Zeitschrift für Säugetierkunde* 80: 1–6.

- 1434 MACKIE, G., and L. FLIPPANCE. 1983. Life history variations in two populations of  
*Sphaerium rhombiodeum* (Bivalvia: Pisidiidae). *Canadian Journal of Zoology* 61:  
1436 860–867.
- MALTBY, L., and P. CALOW. 1986. Intraspecific life-history variation in *Erpobdella*  
1438 *octoculata* (Hirudinea: Erpobdellidae). II. Testing theory on the evolution of  
semelparity and iteroparity. *The Journal of Animal Ecology* 55: 739–750.
- 1440 MARDEN, J.H., H.W. FESCEMYER, M. SAASTAMOINEN, S.P. MACFARLAND, J.C. VERA,  
M.J. FRILANDER, and I. HANSKI. 2008. Weight and nutrition affect pre-mRNA  
1442 splicing of a muscle gene associated with performance, energetics and life history.  
*The Journal of Experimental Biology* 211: 3653–60.
- 1444 MARSHALL, D., and M. KEOUGH. 2007. The evolutionary ecology of offspring size in  
marine vertebrates. *Advances in Marine Biology* 53: 1–60.
- 1446 MARTINS, E., V. BONATO, C. DA SILVA, and S. DOS REIS. 2006. Partial Semelparity in the  
Neotropical Didelphid Marsupial *Gracilinanus microtarsus*. *Journal of Mammalogy*  
1448 87: 915–920.
- MATSUMOTO, M., and M. TAKEDA. 2002. Changes in brain dopamine contents in  
1450 diapause pupae of *Antheraea pernyi* when activated under long-day and by chilling.  
*Journal of Insect Physiology* 48: 765–771.
- 1452 MCBLAIN, B.A., J.D. HESKETH, and R.L. BERNARD. 1987. Genetic Effects on  
Reproductive Phenology in Soybean Isolines Differing in Maturity Genes. *Canadian*  
1454 *Journal of Plant Science* 67: 105–115.
- MCCORMICK, M.A., S.Y. TSAI, and B.K. KENNEDY. 2011. TOR and ageing: a complex

- 1456 pathway for a complex process. *Philosophical Transactions of the Royal Society B: Biological Sciences* 366: 17–27.
- 1458 MCMAHON, R., and A. BOGAN. 2001. Mollusca: bivalvia. In J. Thorp, and A. Covich  
[eds.], Ecology and Classification of North American Freshwater Invertebrates,  
1460 1056. Academic Press, New York, USA.
- MCNAMARA, J.M. 1997. Optimal Life Histories for Structured Populations in Fluctuating  
1462 Environments. *Theoretical Population Biology* 51: 94–108.
- MELO, Y., and W. SAUER. 1999. Confirmation of serial spawning in the chokka squid  
1464 *Loligo vulgaris reynaudii* off the coast of South Africa. *Marine Biology* 135: 307–  
313.
- 1466 MÉNDEZ-VIGO, B., F.X. PICÓ, M. RAMIRO, J.M. MARTÍNEZ-ZAPATER, and C. ALONSO-  
BLANCO. 2011. Altitudinal and climatic adaptation is mediated by flowering traits  
1468 and *FRI*, *FLC*, and *PHYC* genes in Arabidopsis. *Plant Physiology* 157: 1942–55.
- METCALF, J.C., K.E. ROSE, and M. REES. 2003. Evolutionary demography of monocarpic  
1470 perennials. *Trends in Ecology & Evolution* 18: 471–480.
- MEUNIER, J., J.W.Y. WONG, Y. GÓMEZ, S. KUTTLER, L. RÖLLIN, D. STUCKI, and M.  
1472 KÖLLIKER. 2012. One clutch or two clutches? Fitness correlates of coexisting  
alternative female life-histories in the European earwig. *Evolutionary Ecology* 26:  
1474 669–682.
- MICHAELS, S.D., and R.M. AMASINO. 1999. FLOWERING LOCUS C encodes a novel  
1476 MADS domain protein that acts as a repressor of flowering. *Plant Cell* 11: 949–956.
- MICHAELS, S.D., I.C. BEZERRA, and R.M. AMASINO. 2004. FRIGIDA-related genes are

- 1478 required for the winter-annual habit in Arabidopsis. *Proceedings of the National Academy of Sciences of the United States of America* 101: 3281–5.
- 1480 MICHAELS, S.D., Y. HE, K.C. SCORTECCI, and R.M. AMASINO. 2003. Attenuation of  
1482 *FLOWERING LOCUS C* activity as a mechanism for the evolution of summer-  
annual flowering behavior in Arabidopsis. *Proceedings of the National Academy of Sciences of the United States of America* 100: 10102–10107.
- 1484 MILLER, T., J. WILLIAMS, E. JONGEJANS, R. BRYN, and H. JACQUEMYN. 2012.  
Evolutionary demography of iteroparous plants: incorporating non-lethal costs of  
1486 reproduction into integral projection models. *Proceedings of the Royal Society B*.  
279: 2831–40.
- 1488 MILLS, H.R., F.J. BRADSHAW, C. LAMBERT, S.D. BRADSHAW, and R. BENCINI. 2012.  
Reproduction in the marsupial dibbler, *Parantechinus apicalis*; differences between  
1490 island and mainland populations. *General and Comparative Endocrinology* 178:  
347–54.
- 1492 MIRONCHENKO, A., and J. KOZŁOWSKI. 2014. Optimal allocation patterns and optimal  
seed mass of a perennial plant. *Journal of Theoretical Biology* 354: 12–24.
- 1494 MIZOGUCHI, T., L. WRIGHT, S. FUJIWARA, F. CREMER, K. LEE, H. ONOUCHI, A.  
MOURADOV, ET AL. 2005. Distinct Roles of *GIGANTEA* in Promoting Flowering and  
1496 Regulating Circadian Rhythms in Arabidopsis. *The Plant Cell* 17: 2255–2270.
- MIZUKI, I., A. SATO, A. MATSUO, Y. SUYAMA, J.-I. SUZUKI, and A. MAKITA. 2014. Clonal  
1498 Structure, Seed Set, and Self-Pollination Rate in Mass-Flowering Bamboo Species  
during Off-Year Flowering Events. *PLoS ONE* 9: e105051.

- 1500 MONTTI, L., P.I. CAMPANELLO, and G. GOLDSTEIN. 2011. Flowering, die-back and  
recovery of a semelparous woody bamboo in the Atlantic Forest. *Acta Oecologica*  
1502 37: 361–368.
- MORSE, D. 1994. Numbers of broods produced by the crab spider *Misumena vatia*  
1504 (Araneae, Thomisidae). *Journal of Arachnology* 22: 195–199.
- MORSE, D. 1979. Prey capture by the crab spider *Misumena calycina* (Araneae:  
1506 Thomisidae). *Oecologia* 39: 309–319.
- MORSE, D., and E. STEPHENS. 1996. The consequences of adult foraging success on the  
1508 components of lifetime fitness in a semelparous, sit and wait predator. *Evolutionary Ecology* 10: 361–373.
- 1510 MURDOCH, W. 1966. Population stability and life history phenomena. *American Naturalist* 100: 5–11.
- 1512 MURPHY, E., and P. RODHOUSE. 1999. Rapid selection effects in a short-lived  
semelparous squid species exposed to exploitation : inferences from the optimisation  
1514 of life-history functions. *Evolutionary Ecology* 13: 517–537.
- MURPHY, G. 1968. Pattern in life history and the environment. *American Naturalist* 102:  
1516 391–403.
- NAHRGANG, J., O. VARPE, E. KORSHUNOVA, S. MURZINA, I.G. HALLANGER, I. VIEWEG,  
1518 and J. BERGE. 2014. Gender specific reproductive strategies of an arctic key species  
(*Boreogadus saida*) and implications of climate change. *PLOS ONE* 9: e98452.
- 1520 NESIS, K. 1996. Mating, spawning, and death in oceanic cephalopods: a review.  
*Ruthenica* 6: 23–64.



- 1522 NICHOLS, K.M., A.F. EDO, P.A. WHEELER, and G.H. THORGAARD. 2008. The Genetic  
Basis of Smoltification-Related Traits in *Oncorhynchus mykiss*. *Genetics* 179: 1559–  
1524 1575.
- NICHOLS, P.G.H., A. LOI, B.J. NUTT, P.M. EVANS, A.D. CRAIG, B.C. PENGELLY, B.S.  
1526 DEAR, ET AL. 2007. New annual and short-lived perennial pasture legumes for  
Australian agriculture—15 years of revolution. *Field Crops Research* 104: 10–23.
- 1528 NOBEL, P.S. 1977. Water Reliations of Flowering of *Agave deserti*. *Botanical Gazette*  
138: 1–6.
- 1530 NOLTE, A.W., S. RENAUT, and L. BERNATCHEZ. 2009. Divergence in gene regulation at  
young life history stages of whitefish (*Coregonus* sp.) and the emergence of  
1532 genomic isolation. *BMC Evolutionary Biology* 9: 59.
- NYUMURA, N., and T. ASAMI. 2015. Synchronous and Non-Synchronous Semelparity in  
1534 Sibling Species of Pulmonates. *Zoological Science* 32: 372–377.
- O'MALLEY, K.G., M.J. FORD, J.J. HARD, F.W. ALLENDORF, G.H. THORGAARD, A.M.  
1536 ARNESEN, H. TAFTEN, ET AL. 2010. Clock polymorphism in Pacific salmon: evidence  
for variable selection along a latitudinal gradient. *Proceedings of the Royal Society*  
1538 *B: Biological Sciences* 277: 3703–3714.
- OIZUMI, R. 2014. Unification Theory of Optimal Life Histories and Linear Demographic  
1540 Models in Internal Stochasticity. *PLoS ONE* 9: e98746.
- OIZUMI, R., and T. TAKADA. 2013. Optimal life schedule with stochastic growth in age-  
1542 size structured models: Theory and an application. *Journal of Theoretical Biology*  
323: 76–89.

- 1544 OMIELAN, J. 1991. Modeling of semelparous/iteroparous polymorphism in *Botryllus*  
*schlosseri*. University of British Columbia.
- 1546 PALMER, J.D., D.E. SOLTIS, and M.W. CHASE. 2004. The plant tree of life: an overview  
and some points of view. *American Journal of Botany* 91: 1437–1445.
- 1548 PARTRIDGE, L. 2010. The new biology of ageing. *Philosophical Transactions of the Royal*  
*Society of London. Series B, Biological Sciences* 365: 147–54.
- 1550 PEARSE, D.E., M.R. MILLER, A. ABADIA-CARDOSO, and J.C. GARZA. 2014. Rapid parallel  
evolution of standing variation in a single, complex, genomic region is associated  
1552 with life history in steelhead/rainbow trout. *Proceedings of the Royal Society B:*  
*Biological Sciences* 281: 20140012–20140012.
- 1554 PETERSON, D. 1983. Life cycle and reproduction of *Nephelopsis obscura* (Hirudinea:  
Erpobdellidae) in permanent ponds of northwestern Minnesota. *Freshwater*  
1556 *Invertebrate Biology* 2: 165–172.
- PETERSON, J.H., and B. ROITBERG. 2010. Egg maturation, nest state, and sex ratios: a  
1558 dynamic state variable model. *Evolutionary Ecology Research* 12: 347–361.
- PiÑOL, C.M., and R. Banzon. 2011. Catastrophic senescence and semelparity in the  
1560 Penna aging model. *Theory in Biosciences - Theorie in den Biowissenschaften* 130:  
101–6.
- 1562 POSTMA, F.M., and J. ÅGREN. 2016. Early life stages contribute strongly to local  
adaptation in *Arabidopsis thaliana*. *Proceedings of the National Academy of*  
1564 *Sciences of the United States of America* 113: 201606303.
- PUTTERILL, J., F. ROBSON, K. LEE, R. SIMON, and G. COUPLAND. 1995. The CONSTANS

- 1566 gene of arabidopsis promotes flowering and encodes a protein showing similarities  
to zinc finger transcription factors. *Cell* 80: 847–857.
- 1568 RAGLAND, G.J., S.P. EGAN, J.L. FEDER, S.H. BERLOCHER, and D. A. HAHN. 2011.  
Developmental trajectories of gene expression reveal candidates for diapause  
1570 termination: a key life-history transition in the apple maggot fly *Rhagoletis*  
*pomonella*. *Journal of Experimental Biology* 214: 3948–3960.
- 1572 RANTA, E., V. KAITALA, S. ALAJA, and D. TESAR. 2000. Nonlinear Dynamics and the  
Evolution of Semelparous and Iteroparous Reproductive Strategies. *American*  
1574 *Naturalist* 155: 294–300.
- RANTA, E., D. TESAR, S. ALAJA, and V. KAITALA. 2007. Does evolution of iteroparous  
1576 and semelparous reproduction call for spatially structured systems? *Evolution* 54:  
145–150.
- 1578 RANTA, E., D. TESAR, and V. KAITALA. 2002. Environmental variability and semelparity  
vs. iteroparity as life histories. *Journal of Theoretical Biology* 217: 391–396.
- 1580 RANTA, E., D. TESAR, and V. KAITALA. 2001. Local extinctions promote co-existence of  
semelparous and iteroparous life histories. *Evolutionary Ecology Research* 3: 759–  
1582 766.
- RATZ, T., J. KRAMER, M. VEUILLE, and J. MEUNIER. 2016. The population determines  
1584 whether and how life-history traits vary between reproductive events in an insect  
with maternal care. *Oecologia* 182: 443–452.
- 1586 REDEI, G. 1962. Supervital mutants of Arabidopsis. *Genetics* 47: 443–460.
- REES, M., A. SHEPPARD, D. BRIESE, and M. MANGEL. 1999. Evolution of size-dependent

- 1588        flowering in *Onopordum illyricum*: A quantitative assessment of the role of  
stochastic selection pressures. *The American Naturalist* 154: 628–651.
- 1590    REINARTZ, J.A. 1984. Life History Variation of Common Mullein ( *Verbascum*  
Thapsus ): I . Latitudinal Differences in Population Dynamics and Timing of  
1592        Reproduction. *Journal of Ecology* 72: 897–912.
- REMLINGTON, D.L., J. FIGUEROA, and M. RANE. 2015. Timing of shoot development  
1594        transitions affects degree of perenniality in *Arabidopsis lyrata* (Brassicaceae). *BMC*  
*Plant Biology* 15: 226.
- 1596    REMINGTON, D.L., P.H. LEINONEN, J. LEPPÄLÄ, and O. SAVOLAINEN. 2013. Complex  
genetic effects on early vegetative development shape resource allocation  
1598        differences between *Arabidopsis lyrata* populations. *Genetics* 195: 1087–1102.
- RICHTER-BOIX, A., G. ORIZAOLA, and A. LAURILA. 2014. Transgenerational phenotypic  
1600        plasticity links breeding phenology with offspring life-history. *Ecology* 95: 2715–  
2722.
- 1602    RINEHART, J.P., A. LI, G.D. YOCUM, R.M. ROBICH, S.A.L. HAYWARD, and D.L.  
DENLINGER. 2007. Up-regulation of heat shock proteins is essential for cold survival  
1604        during insect diapause. *Proceedings of the National Academy of Sciences of the*  
*United States of America* 104: 11130–7.
- 1606    RINEHART, J.P., G.D. YOCUM, and D.L. DENLINGER. 2000. Developmental upregulation  
of inducible *hsp70* transcripts, but not the cognate form, during pupal diapause in the  
1608        flesh fly, *Sarcophaga crassipalpis*. *Insect Biochemistry and Molecular Biology* 30:  
515–521.

- 1610 RION, S., and T.J. KAWECKI. 2007. Evolutionary biology of starvation resistance: What  
we have learned from *Drosophila*. *Journal of Evolutionary Biology* 20: 1655–1664.
- 1612 ROCHA, F., and A. GUERRA. 1996. Signs of an extended and intermittent terminal  
spawning in the squid *Loligo vulgaris* Lamarck and *Loligo forbesi* Steenstrup  
1614 (Cephalopoda:Loliginidae). *Journal of Experimental Marine Biology and Ecology*  
207: 177–189.
- 1616 ROCHA, F., A. GUERRA, and A.F. GONZÁLEZ. 2001. A review of reproductive strategies in  
cephalopods. *Biological Reviews of the Cambridge Philosophical Society* 76: 291–  
1618 304.
- ROCHA, M., A. VALERA, and L.E. EGUIARTE. 2005. Reproductive ecology of five  
1620 sympatric *Agave littaea* (Agavaceae) species in central Mexico. *American Journal of*  
*Botany* 92: 1330–1341.
- 1622 ROFF, D.A. 1992. The evolution of life histories: theory and analysis. Chapman and Hall,  
New York.
- 1624 ROSE, K.E., M. REES, and P. GRUBB. 2002. Evolution in the real world: stochastic  
variation and the determinants of fitness in *Carlina vulgaris*. *Evolution* 56: 1416–  
1626 1430.
- ROZAS, V. 2003. Tree age estimates in *Fagus sylvatica* and *Quercus robur*: testing  
1628 previous and improved methods. *Plant Ecology* 167: 193–212.
- RUBENSTEIN, D.R. 2011. Spatiotemporal environmental variation , risk aversion , and the  
1630 evolution of cooperative breeding as a bet-hedging strategy. *Proceedings of the*  
*National Academy of Sciences* 108: 10816–10822.

- 1632 RUDNICKI, R., and R. WIECZOREK. 2014. On a nonlinear age-structured model of  
semelparous species. *Discrete and Continuous Dynamical Systems-Series B* 19:  
1634 2641–2656.
- SAASTAMOINEN, M., S. IKONEN, and I. HANSKI. 2009. Significant effects of *Pgi* genotype  
1636 and body reserves on lifespan in the Glanville fritillary butterfly. *Proceedings.  
Biological sciences / The Royal Society* 276: 1313–1322.
- 1638 SALGUERO-GÓMEZ, R., O.R. JONES, E. JONGEJANS, S.P. BLOMBERG, D.J. HODGSON, C.  
MBAU-ACHE, P.A. ZUIDEMA, ET AL. 2016. Fast–slow continuum and reproductive  
1640 strategies structure plant life-history variation worldwide. *Proceedings of the  
National Academy of Sciences* 113: 230–235.
- 1642 SAMACH, A., H. ONOUCHI, S.E. GOLD, G.S. DITTA, Z. SCHWARZ-SOMMER, M.F.  
YANOFSKY, G. COUPLAND, ET AL. 2000. Distinct roles of *CONSTANS* target genes in  
1644 reproductive development of Arabidopsis. *Science* 288: 1613–6.
- SATO, K., M. YAMANE, N. YAMAJI, H. KANAMORI, A. TAGIRI, J.G. SCHWERDT, G.B.  
1646 FINCHER, ET AL. 2016. Alanine aminotransferase controls seed dormancy in barley.  
*Nature Communications* 7: 11625.
- 1648 SAUER, W., Y. MELO, and W. DE WET. 1999. Fecundity of the chokka squid *Loligo  
vulgaris reynaudii* on the southeastern coast of South Africa. *Marine Biology* 135:  
1650 315–319.
- SCHAFFER, W. 1974a. Optimal reproductive effort in fluctuating environments. *American  
1652 Naturalist*.
- SCHAFFER, W. 1974b. Selection for optimal life histories: the effects of age structure.

- 1654        *Ecology* 55: 291–303.
- SCHAFFER, W., and M. GADGIL. 1975. Selection for optimal life histories in plants. *In* M.
- 1656        Cody, and J. Diamond [eds.], *Ecology and Evolution of Communities*, Belknap
- Press, Cambridge, MA, USA.
- 1658        SCHLÄPPI, M.R. 2006. *FRIGIDA LIKE 2* is a functional allele in *Landsberg erecta* and
- compensates for a nonsense allele of *FRIGIDA LIKE 1*. *Plant Physiology* 142:
- 1660        1728–38.
- SCHNEIDER, J., and Y. LUBIN. 1997. Does high adult mortality explain semelparity in the
- 1662        spider *Stegodyphus lineatus* (Eresidae)? *Oikos* 79: 92–100.
- SCHNEIDER, J., M. SALOMON, and Y. LUBIN. 2003. Limited adaptive life-history
- 1664        plasticity in a semelparous spider, *Stegodyphus lineatus* (Eresidae). *Evolutionary*
- Ecology Research* 5: 731–738.
- 1666        SCHNEIDER, M.R., and E. WOLF. 2008. The epidermal growth factor receptor and its
- ligands in female reproduction: insights from rodent models. *Cytokine & Growth*
- 1668        *Factor Reviews* 19: 173–81.
- SEAMONS, T.R., and T.P. QUINN. 2010. Sex-specific patterns of lifetime reproductive
- 1670        success in single and repeat breeding steelhead trout (*Oncorhynchus mykiss*).
- Behavioral Ecology and Sociobiology* 64: 505–513.
- 1672        SELMAN, C., and D.J. WITHERS. 2011. Mammalian models of extended healthy lifespan.
- Philosophical Transactions of the Royal Society of London. Series B, Biological*
- 1674        *Sciences* 366: 99–107.
- SHAMA, L.S., and C.T. ROBINSON. 2009. Microgeographic life history variation in an

- 1676 alpine caddisfly: plasticity in response to seasonal time constraints. *Freshwater*  
*Biology* 54: 150–164.
- 1678 SHELDON, C.C., D.T. ROUSE, E.J. FINNEGAN, W.J. PEACOCK, and E.S. DENNIS. 2000. The  
molecular basis of vernalization: the central role of *FLOWERING LOCUS C (FLC)*.  
1680 *Proceedings of the National Academy of Sciences of the United States of America*  
97: 3753–3758.
- 1682 SHINDO, C., M.J. ARANZANA, C. LISTER, C. BAXTER, C. NICHOLLS, M. NORDBORG, and  
C. DEAN. 2005. Role of *FRIGIDA* and *FLOWERING LOCUS C* in determining  
1684 variation in flowering time of Arabidopsis. *Plant Physiology* 138: 1163–1173.
- SHINDO, C., C. LISTER, P. CREVILLEN, M. NORDBORG, and C. DEAN. 2006. Variation in  
1686 the epigenetic silencing of *FLC* contributes to natural variation in Arabidopsis  
vernalization response. *Genes & Development* 20: 3079–3083.
- 1688 SIEPEL, H. 1994. Life-history tactics of soil microarthropods. *Biology and Fertility of*  
*Soils* 18: 263–278.
- 1690 SILVERTOWN, J., M. FRANCO, I. PISANTYT, and A. MENDOZA. 1993. Comparative plant  
demography - relative importance of life-cycle components to the finite rate of  
1692 increase in woody and herbaceous perennials. *Journal of Ecology* 81: 465–476.
- SILVERTOWN, J., and D.D.M. GORDON. 1989. A framework for plant behavior. *Annual*  
1694 *Review of Ecology and Systematics* 20: 349–366.
- SIMON, S., M. RÜHL, A. DE MONTAIGU, S. WÖTZEL, and G. COUPLAND. 2015. Evolution  
1696 of *CONSTANS* Regulation and Function after Gene Duplication Produced a  
Photoperiodic Flowering Switch in the Brassicaceae. *Molecular Biology and*



- 1698        *Evolution* 32: 2284–301.
- 1700        *Science* 296: 285–289.
- 1702        SINGH, K.C., and N.I. SINGH. 1998. Biology and ecology of temperate tasar silkmths,  
          *Antheraea proylei* Jolly and *Antheraea pernyi* Guerin-Meneville (Saturiniidae): a  
          review. *Indian Journal of Sericulture* 37: 89–100.
- 1704        SKUBIC, E., M. TABORSKY, J.M. MCNAMARA, and A.I. HOUSTON. 2004. When to  
          parasitize? A dynamic optimization model of reproductive strategies in a  
1706        cooperative breeder. *Journal of Theoretical Biology* 227: 487–501.
- 1708        SLETVOLD, N. 2002. Effects of plant size on reproductive output and offspring  
          performance in the facultative biennial *Digitalis purpurea*. *Journal of Ecology* 90:  
          958–986.
- 1710        SLOAT, M.R.M., D.D.J. FRASER, J.B.J. DUNHAM, J. A. FALKE, C.E. JORDAN, J.R.  
          MCMILLAN, and H. A. OHMS. 2014. Ecological and evolutionary patterns of  
1712        freshwater maturation in Pacific and Atlantic salmonines. *Reviews in Fish Biology*  
          and *Fisheries* 24: 689–707.
- 1714        SMITH, C., and S. FRETWELL. 1974. The optimal balance between size and number of  
          offspring. *American Naturalist* 108: 499–506.
- 1716        SMITH, F., and E. CHARNOV. 2001. Fitness trade-offs select for semelparous reproduction  
          in an extreme environment. *Evolutionary Ecology Research* 3: 595–602.
- 1718        SMITH, S.E., E. RILEY, J.L. TISS, and D.M. FENDENHEIM. 2000. Geographical variation in  
          predictive seedling emergence in a perennial desert grass. *Journal of Ecology* 88:

- 1720 139–149.
- SNOWDEN, K.C. 2005. The Decreased apical dominance1/*Petunia hybrida* *CAROTENOID*
- 1722 *CLEAVAGE DIOXYGENASE8* Gene Affects Branch Production and Plays a Role in
- Leaf Senescence, Root Growth, and Flower Development. *The Plant Cell* 17: 746–
- 1724 759.
- SNYDER, R. 1991. No Quantitative genetic analysis of life histories in two freshwater
- 1726 populations of threespine stickleback. *Copeia* 1991: 526–529.
- SONG, B., Z.-Q. ZHANG, J. STÖCKLIN, Y. YANG, Y. NIU, J.-G. CHEN, and H. SUN. 2013.
- 1728 Multifunctional bracts enhance plant fitness during flowering and seed development
- in *Rheum nobile* (Polygonaceae), a giant herb endemic to the high Himalayas.
- 1730 *Oecologia* 172: 359–370.
- SONG, Y., X. KE, W. LIU, A.J. DAVY, and G. LIU. 2015. Life-History Plasticity of
- 1732 Riparian Annual Plants Adapted to Extreme Variations in Water Level: Mesocosm
- Experiments. *River Research and Applications* 31: 1311–1318.
- 1734 SOREFAN, K., J. BOOKER, K. HAUROGNÉ, M. GOUSSOT, K. BAINBRIDGE, E. FOO, S.
- CHATFIELD, ET AL. 2003. *MAX4* and *RMS1* are orthologous dioxygenase-like genes
- 1736 that regulate shoot branching in Arabidopsis and pea. *Genes & Development* 17:
- 1469–1474.
- 1738 SPICE, E.K., S. WHYARD, and M.F. DOCKER. 2014. Gene expression during ovarian
- differentiation in parasitic and non-parasitic lampreys: Implications for fecundity
- 1740 and life history types. *General and Comparative Endocrinology* 208: 116–125.
- SPRINGTHORPE, V., and S. PENFIELD. 2015. Flowering time and seed dormancy control se

- 1742 external coincidence to generate life history strategy. *eLife* 4: 1–17.
- STEBBINS, G.L., and R.D. HOOGLAND. 1976. Species diversity, ecology and evolution in a
- 1744 primitive Angiosperm genus: *Hibbertia* (Dilleniaceae). *Plant Systematics and Evolution* 125: 139–154.
- 1746 STEGMANN, U., and K. LINSENMAIR. 2002. Assessing the Semelparity Hypothesis: Egg-guarding and Fecundity in the Malaysian Treehopper *Pyrgauchenia tristaniopsis*.
- 1748 *Ethology* 108: 857–869.
- STEVENS, J., M. HICKFORD, and D. SCHIEL. 2016. Evidence of iteroparity in the widely
- 1750 distributed diadromous fish inanga *Galaxias maculatus* and potential implications for reproductive output. *Journal of Fish Biology* 89: 1931–1946.
- 1752 STINCHCOMBE, J.R., C. WEINIG, M. UNGERER, K.M. OLSEN, C. MAYS, S.S. HALLDORSDDOTTIR, M.D. PURUGGANAN, and J. SCHMITT. 2004. A latitudinal cline in
- 1754 flowering time in *Arabidopsis thaliana* modulated by the flowering time gene *FRIGIDA*. *Proceedings of the National Academy of Sciences* 101: 4712–4717.
- 1756 SU, Z., and R.M. PETERMAN. 2012. Performance of a Bayesian state-space model of semelparous species for stock-recruitment data subject to measurement error.
- 1758 *Ecological Modelling* 224: 76–89.
- SUÁREZ-LÓPEZ, P., K. WHEATLEY, F. ROBSON, H. ONOUCHI, F. VALVERDE, and G. COUPLAND. 2001. *CONSTANS* mediates between the circadian clock and the control
- 1760 of flowering in *Arabidopsis*. *Nature* 410: 1116–1120.
- 1762 SULAIMAN, I.M., and C.R. BABU. 1996. Ecological studies on five species of endangered Himalayan poppy, *Meconopsis* (Papaveraceae). *Botanical Journal of the Linnean*

- 1764        *Society* 121: 169–176.
- TALLAMY, D., E. WALSH, and D. PECK. 2004. Revisiting paternal care in the assassin bug,
- 1766        *Atopozelus pallens* (Heteroptera: Reduviidae). *Journal of Insect Behavior* 17: 431–436.
- 1768        TALLAMY, D.W., and W.P. BROWN. 1999. Semelparity and the evolution of maternal care in insects. *Animal Behaviour* 57: 727–730.
- 1770        TATAR, M., A. BARTKE, and A. ANTEBI. 2003. The endocrine regulation of aging by insulin-like signals. *Science* 299: 1346–1351.
- 1772        TATAR, M., S. CHIEN, and N. PRIEST. 2001. Negligible senescence during reproductive diapause in *Drosophila melanogaster*. *American Naturalist* 158: 248–258.
- 1774        THOMAS, H. 2013. Senescence , ageing and death of the whole plant. *New Phytologist* 197: 696–711.
- 1776        THOMAS, H., L. HUANG, M. YOUNG, and H. OUGHAM. 2009. Evolution of plant senescence. *BMC Evolutionary Biology* 9: 163.
- 1778        THOMPSON, D.W. 1907. The History of Animals (Aristotle). John Bell, London, UK.
- THOMPSON, L. 1994. The Spatiotemporal Effects of Nitrogen and Litter on the Population
- 1780        Dynamics of *Arabidopsis thaliana*. *Journal of Ecology* 82: 63–68.
- THREADGILL, P.F., J.M. BASKIN, and C.C. BASKIN. 1981. The Ecological Life Cycle of
- 1782        *Frasera caroliniensis*, a Long-lived Monocarpic Perennial. *American Midland Naturalist* 105: 277–289.
- 1784        TINKLE, D.W. 1969. The Concept of Reproductive Effort and Its Relation to the Evolution of Life Histories of Lizards. *The American Naturalist* 103: 501–516.

- 1786 TIWARI, S.B., Y. SHEN, H.-C. CHANG, Y. HOU, A. HARRIS, S.F. MA, M. MCPARTLAND, ET  
AL. 2010. The flowering time regulator *CONSTANS* is recruited to the *FLOWERING*  
1788 *LOCUS T* promoter via a unique cis-element. *The New Phytologist* 187: 57–66.
- TORANG, P., J. WUNDER, J. OBESO, M. HERZOG, G. COUPLAND, and J. AGREN. 2015.  
1790 Large-scale adaptive differentiation in the alpine perennial herb *Arabis alpina*. *New*  
*Phytologist* 206: 459–470.
- 1792 TOWER, J. 1996. Aging mechanisms in fruit flies. *BioEssays* 18: 799–807.
- TRUMBO, S.T. 2013. Maternal Care, Iteroparity and the Evolution of Social Behavior: A  
1794 Critique of the Semelparity Hypothesis. *Evolutionary Biology* 40: 613–626.
- TURCK, F., and G. COUPLAND. 2014. Natural variation in epigenetic gene regulation and  
1796 its effects on plant developmental traits. *Evolution* 68: 620–31.
- TURCK, F., F. FORNARA, and G. COUPLAND. 2008. Regulation and Identity of Florigen:  
1798 *FLOWERING LOCUS T* Moves Center Stage. *Annual Review of Plant Biology* 59:  
573–594.
- 1800 UNWIN, M., M.T. KINNISON, and T.P. QUINN. 1999. Exceptions to semelparity:  
postmaturation survival, morphology, and energetics of male chinook salmon  
1802 (*Oncorhynchus tshawytscha*). *Canadian Journal of Fisheries and Aquatic Sciences*  
56: 1172–1181.
- 1804 VAHL, O. 1981. Age-specific residual reproductive value and reproductibve effort in the  
Iceland Scallop, *Chlamys islandica*. *Oecologia* 51: 53–56.
- 1806 VALVERDE, F., A. MOURADOV, W. SOPPE, D. RAVENSCROFT, A. SAMACH, and G.  
COUPLAND. 2004. Photoreceptor regulation of *CONSTANS* protein in photoperiodic

- 1808            flowering. *Science* 303: 1003–6.
- VARELA-LASHERAS, I., and T.J. VAN DOOREN. 2014. Desiccation plasticity in the
- 1810            embryonic life histories of non-annual rivulid species. *EvoDevo* 5: 16.
- VAUPEL, J.W., T.I. MISOV, and C.J.E. METCALF. 2013. Optimal semelparity. C. M.
- 1812            Aegerter [ed.], *PloS one* 8: e57133.
- VECCHIONE, M., U. PIATKOWSKI, and A. ALLCOCK. 1998. Biology of the cirrate octopod
- 1814            *Grimpoteuthis glacialis* (Cephalopoda; Opisthoteuthidae) in the South Shetland
- Islands, Antarctica. *South African Journal of Marine Science* 20: 421–428.
- 1816            VERVOORT, A., V. CAWOY, and A.-L. JACQUEMART. 2011. Comparative Reproductive
- Biology in Co-Occurring Invasive and Native *Impatiens* Species. *International*
- 1818            *Journal of Plant Sciences* 172: 366–377.
- VILLANUEVA, R. 1992. Continuous spawning in the cirrate octopods *Opisthoteuthis*
- 1820            *agassizii* and *O. vossi*: features of sexual maturation defining a reproductive strategy
- in cephalopods. *Marine Biology* 114: 265–275.
- 1822            VITOUSEK, M.N., M.A. MITCHELL, L.M. ROMERO, J. AWERMAN, and M. WIKELSKI. 2010.
- To breed or not to breed: Physiological correlates of reproductive status in a
- 1824            facultatively biennial iguanid. *Hormones and Behavior* 57: 140–146.
- WANG, R., M.C. ALBANI, C. VINCENT, S. BERGONZI, M. LUAN, Y. BAI, C. KIEFER, ET AL.
- 1826            2011. Aa TFL1 confers an age-dependent response to vernalization in perennial
- Arabis alpina*. *Plant Cell* 23: 1307–1321.
- 1828            WANG, R., S. FARRONA, C. VINCENT, F. FORNARA, A. JOECKER, H. SCHOOF, F. TURCK, ET
- AL. 2009. Control of perennial flowering and perenniality in *Arabis alpina*, a relative

- 1830 of *Arabidopsis thaliana*. *Comparative Biochemistry and Physiology Part A: Molecular & Integrative Physiology* 153: S195–S196.
- 1832 WANG, R., S. FARRONA, C. VINCENT, A. JOECKER, H. SCHOOF, F. TURCK, C. ALONSO-BLANCO, ET AL. 2009. PEP1 regulates perennial flowering in *Arabis alpina*. *Nature* 459: 423–427.
- 1834 WANG, Y., L. CHENG, J. LENG, C. WU, G. SHAO, W. HOU, and T. HAN. 2015. Genetic analysis and quantitative trait locus identification of the reproductive to vegetative growth period ratio in soybean (*Glycine max* (L.) Merr.). *Euphytica* 201: 275–284.
- 1836 WANGE, S., M.-S. SAMAIN, L. VANDERSCHAEVE, G. MATHIEU, P. GOETGHEBEUR, and C. NEINHUIS. 2006. Phylogeny of the Genus *Peperomia* (Piperaceae) Inferred from the *trnK/matK* Region (cpDNA). *Plant Biology* 8: 93–102.
- 1840 WANNTORP, L., H. WANNTORP, and M. KÄLLERSJÖ. 2002. Phylogenetic relationships of *Gunnera* based on nuclear ribosomal DNA ITS region, *rbcL* and *rps16* intron sequences. *Systematic Botany* 27: 512–521.
- 1842 WAPLES, R.S. 2016. Life-history traits and effective population size in species with overlapping generations revisited: the importance of adult mortality. *Heredity* 117: 241–250.
- 1846 WARD, P.D. 1983. *Nautilus macromphalus*. In P. R. Boyle [ed.], *Cephalopod Life Cycles* Vol. 1, 11–28. Academic Press, London, UK.
- 1848 WARD, P.D. 1987. The natural history of *Nautilus*. Allen & Unwin Inc., Boston, USA.
- 1850 WATT, W.B. 1983. Adaptation at Specific Loci. II. Demographic and Biochemical Elements in the Maintenance of the *Colias Pgi* Polymorphism. *Genetics* 103: 691–

- 1852            724.
- WATT, W.B., R.C. CASSIN, and M.S. SWAN. 1983. Adaptation at Specific Loci. III. Field
- 1854            Behavior and Survivorship Differences among *Colias Pgi* Genotypes Are
- Predictable from in Vitro Biochemistry. *Genetics* 103: 725–739.
- 1856            WIKAN, A. 2012. Age or Stage Structure? A Comparison of Dynamic Outcomes from
- Discrete Age- and Stage-Structured Population Models. *Bulletin of Mathematical*
- 1858            *Biology* 74: 1354–1378.
- DE WILDE, J. 2010. Begoniaceae. In *Flowering Plants: Eudicots*, 56–71. Springer, Berlin.
- 1860            VAN WILGEN, B.W., and G.G. FORSYTH. 1992. Regeneration Strategies in Fynbos Plants
- and Their Influence on the Stability of Community Boundaries After Fire. *In* 54–80.
- 1862            Springer Berlin Heidelberg.
- WILLIAMS, G. 1966. Natural selection, the costs of reproduction, and a refinement of
- 1864            Lack's principle. *The American Naturalist* 100: 687–690.
- WILLIAMS, J.L. 2009. Flowering life-history strategies differ between the native and
- 1866            introduced ranges of a monocarpic perennial. *American Naturalist* 174: 660–672.
- WILLIAMS, P., and C. HILL. 1986. Rapid-cycling populations of Brassicaceae. *Science*
- 1868            232: 1385–1389.
- WILZCEK, A., J. ROE, M. KNAPP, C. COOPER, L. MARTIN, C. MUIR, S. SIM, ET AL. 2009.
- 1870            Effects of genetic perturbation on seasonal life history. *Science* 323: 930–935.
- WINKLER, E., and F. M. 2002. The role of vegetative spread and seed dispersal for
- 1872            optimal life histories of clonal plants: a simulation study. *Evolutionary Ecology* 15:
- 281–301.



- 1874 WOLFE, K., H. MILLS, M. GARKAKLIS, and R. BENCINI. 2004. Post-mating survival in a  
small marsupial is associated with nutrient inputs from seabirds. *Ecology* 85: 1740–  
1876 1746.
- DE WREEDE, R., and T. KLINGER. 1988. Reproductive strategies in algae. Oxford  
1878 University Press, New York, USA.
- XIA, Q., Y. GUO, Z. ZHANG, D. LI, Z. XUAN, Z. LI, F. DAI, ET AL. 2009. Complete  
1880 Resequencing of 40 Genomes Reveals Domestication Events and Genes in  
Silkworm (*Bombyx*). *Science* 326: 433–436.
- 1882 XIN, D.W., H.M. QIU, D.P. SHAN, C.Y. SHAN, C.Y. LIU, G.H. HU, C. STAEHELIN, and  
Q.S. CHEN. 2008. Analysis of quantitative trait loci underlying the period of  
1884 reproductive growth stages in soybean (*Glycine max* [L.] Merr.). *Euphytica* 162:  
155–165.
- 1886 YANOVSKY, M., and S. KAY. 2002. Molecular basis of seasonal time measurement in  
*Arabidopsis*. *Nature* 419: 308–312.
- 1888 YERKES, T., and M. KOOPS. 1999. Redhead reproductive strategy choices: a dynamic  
state variable model. *Behavioral Ecology* 10: 30–40.
- 1890 YOUNG, T. 1981. A General Model of Comparative Fecundity for Semelparous and  
Iteroparous Life Histories. *American Naturalist* 118: 27–36.
- 1892 YOUNG, T.P. 1990. Evolution of semelparity in Mount Kenya lobelias. *Evolutionary  
Ecology* 4: 157–171.
- 1894 YOUNG, T.P., and C.K. AUGSPURGER. 1991. Ecology and evolution of long-lived  
semelparous plants. *Trends in Ecology & Evolution* 6: 285–9.

- 1896 YOUNG, T.P.T. 1984. The Comparative Demography of Semelparous *Lobelia telekii* and  
Iteroparous *Lobelia keniensis* on Mount Kenya. *Journal of Ecology* 72: 637–650.
- 1898 YOUSON, J.H., J.A. HEINIG, S.F. KHANAM, S.A. SOWER, H. KAWAUCHI, and F.W.  
KEELEY. 2006. Patterns of proopiomelanotropin and proopiocortin gene expression  
1900 and of immunohistochemistry for gonadotropin-releasing hormones (IGnRH-I and  
III) during the life cycle of a nonparasitic lamprey: Relationship to this adult life  
1902 history type. *General and Comparative Endocrinology* 148: 54–71.
- ZEINEDDINE, M., and V.A. JANSEN. 2009. To age, to die: parity, evolutionary tracking and  
1904 Cole’s paradox. *Evolution* 63: 1498–507.
- ZERA, A., and Y. HUANG. 1999. Evolutionary endocrinology of juvenile hormone  
1906 esterase: functional relationship with wing polymorphism in the cricket, *Gryllus*  
*firmus*. *Evolution* 53: 837–847.
- 1908 ZHAO, Z., and A. ZERA. 2002. Differential lipid biosynthesis underlies a trade-off  
between reproduction and flight capability in a wing-polymorphic cricket.  
1910 *Proceedings of the National Academy of Sciences* 99: 16829–16834.
- ZHOU, C., T. ZHANG, X. WANG, S. YU, H. LIAN, H. TANG, Z. FENG, ET AL. 2013.  
1912 Molecular basis of age-dependent vernalization in *Cardamine flexuosa*. *Science* 340:  
1097–1100.
- 1914 ZIPPAY, M.L., G.E. HOFMANN, and G.E. HOFMAN. 2010. Effect of pH on gene expression  
and thermal tolerance of early life history stages of red abalone (*Haliotis rufescens*).  
1916 *Journal of Shellfish Research* 29: 429–439.
